# Supplementary material for: Synthesis and structures of unsymmetrical bull's horn-shaped heptathienoacenes with isomeric location of sulfur atoms
Source: Royal Society of Chemistry journal article supplement (doi:10.1039/d0qo00957a), 2020-01-01
Supplement: d0qo00957a1.pdf [file d0qo00957a1.pdf]

*Supporting Information for*

Synthesis and Structures of Unsymmetrical Bull's Horn-Shaped  
Heptathienoacenes with Isomeric Location of Sulfur Atoms

Chao Zhang, Zhiying Ma, Guangxia Wang, Chunli Li\* and Hua Wang\*

Engineering Research Center for Nanomaterials, Henan University, Kaifeng, 475004, China

Table of Contents

|    |                                                                                                      |     |
|----|------------------------------------------------------------------------------------------------------|-----|
| 1  | General information                                                                                  | S2  |
| 2  | References                                                                                           | S3  |
| 3  | NMR and HRMS spectra                                                                                 | S3  |
|    | NMR and HRMS spectra of <b>6</b>                                                                     | S3  |
|    | NMR and HRMS spectra of <b>7</b>                                                                     | S4  |
|    | NMR and HRMS spectra of <b>1</b>                                                                     | S5  |
|    | NMR and HRMS spectra of <b>9</b>                                                                     | S6  |
|    | NMR and HRMS spectra of <b>2</b>                                                                     | S7  |
|    | NMR and HRMS spectra of <b>10</b>                                                                    | S8  |
|    | NMR and HRMS spectra of <b>11</b>                                                                    | S9  |
|    | NMR and HRMS spectra of <b>3</b>                                                                     | S10 |
|    | <sup>1</sup> H NMR spectrum of <b>12</b>                                                             | S11 |
|    | NMR and HRMS spectra of <b>4</b>                                                                     | S11 |
| 4  | UV-vis absorption spectra of <b>1-4</b>                                                              | S12 |
| 5  | XRD patterns of <b>1-4</b>                                                                           | S14 |
| 6  | Cyclic voltammetry of <b>1-4</b>                                                                     | S14 |
| 7  | Table S1. Photophysical and Electrochemical Data for <b>1-4</b>                                      | S15 |
| 8  | DFT calculations of <b>1-4</b> at the B3LYP/6-31G** level of theory                                  | S15 |
| 9  | Table S2. Adiabatic ionization potentials, reorganization energy, and average mobility of <b>1-4</b> | S15 |
| 10 | Table S3. Transfer integral of <b>1-4</b>                                                            | S16 |
| 11 | Table S4. Total energies of optimized structures of <b>1-4</b>                                       | S16 |
| 12 | X-ray crystallographic data                                                                          | S24 |
|    | Completed crystal data for <b>1</b>                                                                  | S24 |
|    | Completed crystal data for <b>2</b>                                                                  | S25 |
|    | Completed crystal data for <b>3</b>                                                                  | S27 |
|    | Completed crystal data for <b>4</b>                                                                  | S28 |

## 1. General information

Ether and tetrahydrofuran (THF) for use on vacuum line were freshly distilled from sodium/benzophenone prior to use. *t*-BuLi (pentane) and *n*-BuLi (hexane) were obtained from Energy Chemical prior to use, and their concentrations were determined by titration with *N*-pivaloyl-*o*-toluidine.<sup>1</sup> Column chromatography was carried out on silica gel (300-400 mesh). Analytical thin-layer chromatography was performed on glass plates of silica gel GF-254 with detection by UV. Standard techniques for synthesis under inert atmosphere, using gasbag and Schlenk glassware equipped with an 8 mm PTFE vacuum stopcock, were employed. All starting materials and reagents were commercially available.

<sup>1</sup>H NMR and <sup>13</sup>C{<sup>1</sup>H} NMR spectra were recorded on 300 or 400 MHz NMR instruments using CDCl<sub>3</sub> ( $\delta$ H (7.26 ppm) and CDCl<sub>3</sub>  $\delta$  C (77.00 ppm)) as solvent. IR spectra were obtained using an FT-IR instrument. MS analysis was carried out at 70 eV MS spectrometer using a direct insertion. HRMS analysis was carried out on mass spectrometers equipped with ESI and DART Positive. Melting point determination was taken on a Melt-Temp apparatus and was uncorrected. UV-vis spectra were obtained with a double-beam spectrophotometer at room temperature. Cyclic voltammetry (CV) was performed on an electrochemical analyzer with a three-electrode cell in the solution of 0.1 M tetrabutylammonium hexafluorophosphate (Bu<sub>4</sub>NPF<sub>6</sub>) dissolved in CH<sub>2</sub>Cl<sub>2</sub>. Platinum electrode (0.6 cm<sup>2</sup>), Pt wire and Ag/AgCl electrode were used as the working electrode, counter electrode and reference electrode, respectively. The X-ray crystallographic analyses were performed using crystals of compounds **1-4** with the size 0.12 × 0.10 × 0.08, 0.21 × 0.14 × 0.07, 0.21 × 0.11 × 0.06 and 0.22 × 0.18 × 0.13 mm, respectively. The intensity data were collected on a diffractometer with a CCD detector using Mo K $\alpha$  radiation ( $\lambda$  = 0.71073 Å) and with the  $\omega$  scan mode 100 K, 298 K, 150 K and 230 K, respectively. The data were corrected for Lorentz and polarization effects, and absorption corrections were performed using SADABS program.<sup>2</sup> The crystal structures were solved using the SHELXTL program and refined using full-matrix least-squares.<sup>3</sup>

Further details are in the deposited CIF files. Slow evaporation of solutions of **1-4** in  $\text{CHCl}_3\text{-CH}_3\text{OH}$  (1:3, v/v) was employed for growing single crystals.

## 2. References

- [1] J. Suffert, Simple Direct Titration of Organolithium Reagents Using N-Pivaloyl-*o*-toluidine and/or N-pivaloyl-*o*-benzylaniline. *J. Org. Chem.*, 1989, **54**, 509-510.
- [2] G. M. Sheldrick, *SADABS*, University of Gottingen: Germany, 1996.
- [3] G. M. Sheldrick. *SHELXTL*, version 5.1; Bruker Analytical X-ray Systems, Inc.: Madison, WI, 1997.

## 3. NMR and HRMS spectra

NMR and HRMS spectra of **6**

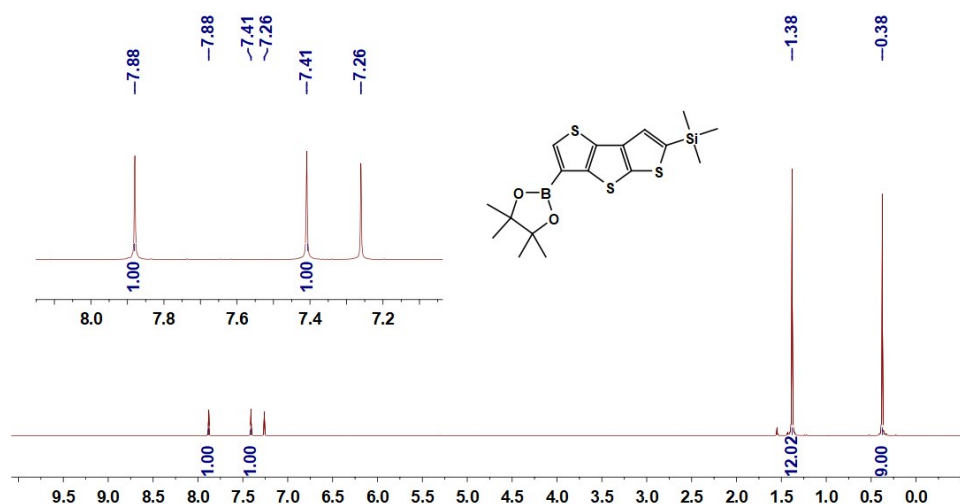

Figure S1.  $^1\text{H}$  NMR (400 MHz,  $\text{CDCl}_3$ ) spectrum of **6**

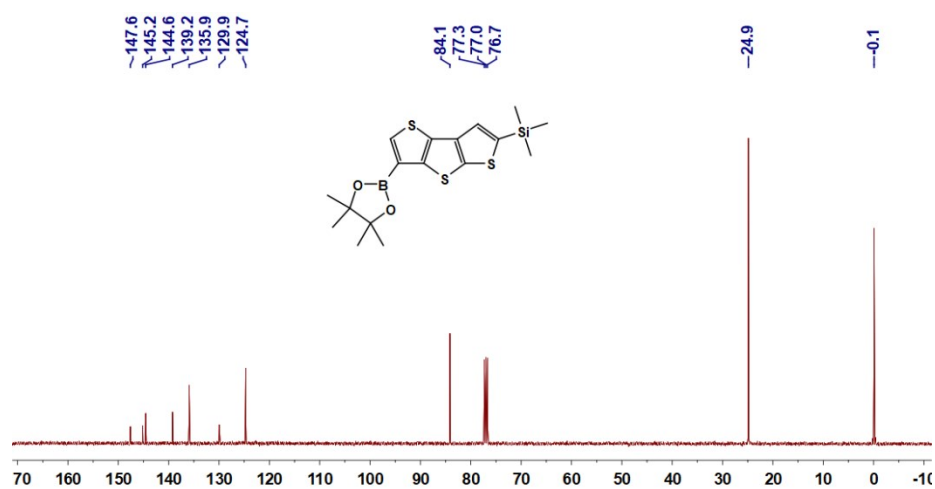

Figure S2.  $^{13}\text{C}$  NMR (100 MHz,  $\text{CDCl}_3$ ) spectrum of **6**

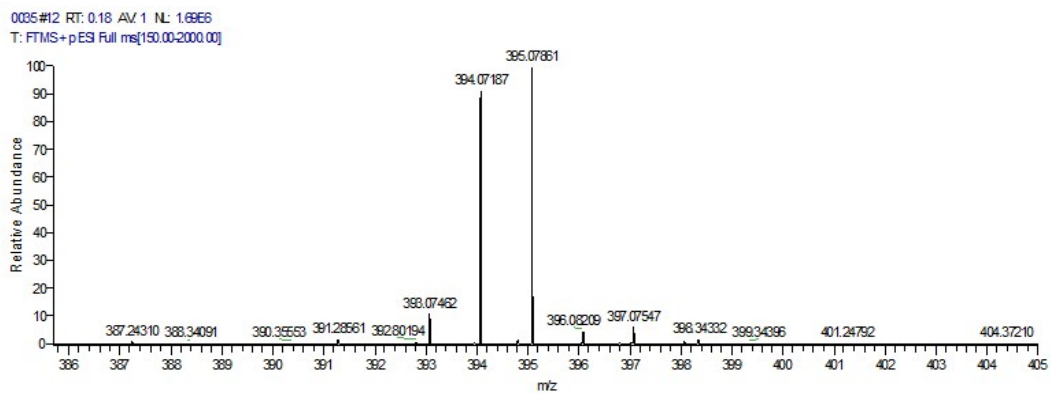

Figure S3. HRMS spectrum of 6

NMR and HRMS spectra of 7

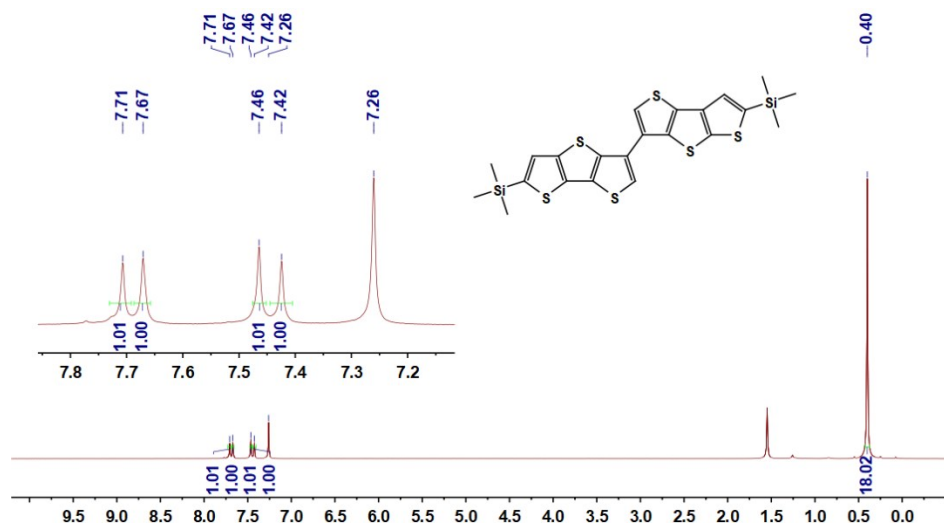

Figure S4. <sup>1</sup>H NMR (400 MHz, CDCl<sub>3</sub>) spectrum of 7

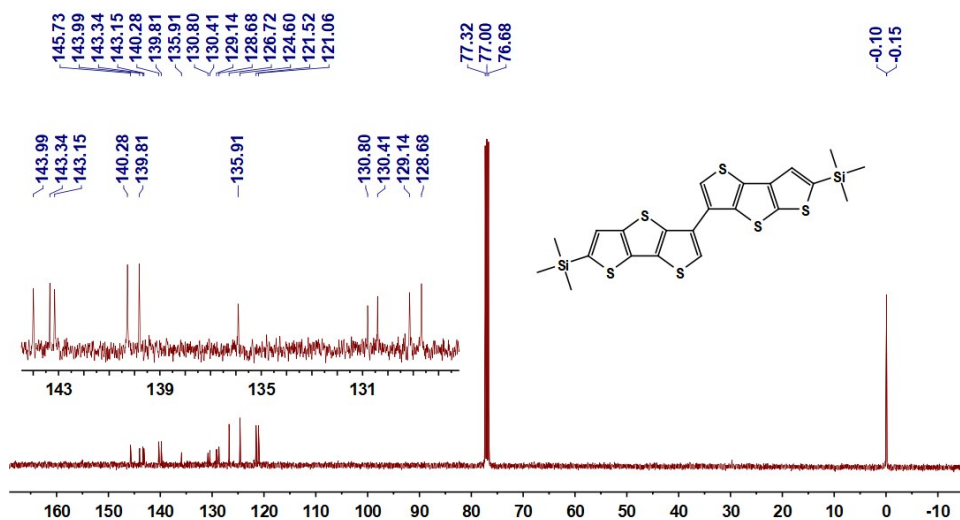

Figure S5. <sup>13</sup>C NMR (100 MHz, CDCl<sub>3</sub>) spectrum of 7

Z-3: HRMS (ESI) m/z calcd for  $C_{22}H_{22}S_6Si_2^+$  (M)<sup>+</sup> 533.95788, found 533.95788; calcd

for  $C_{22}H_{23}S_6Si_2^+$  (M+H)<sup>+</sup> 534.96570, found 534.96558.

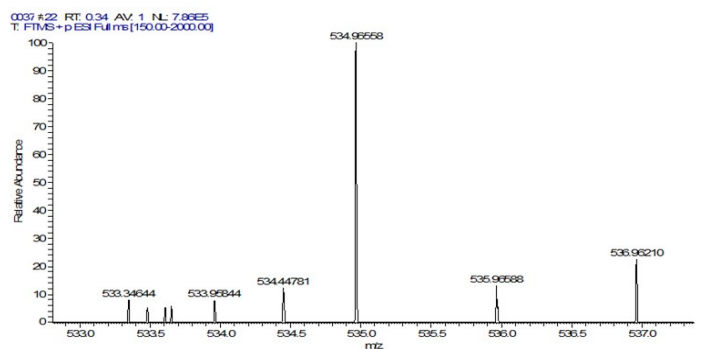

Figure S6. HRMS spectrum of 7

NMR and HRMS spectra of 1

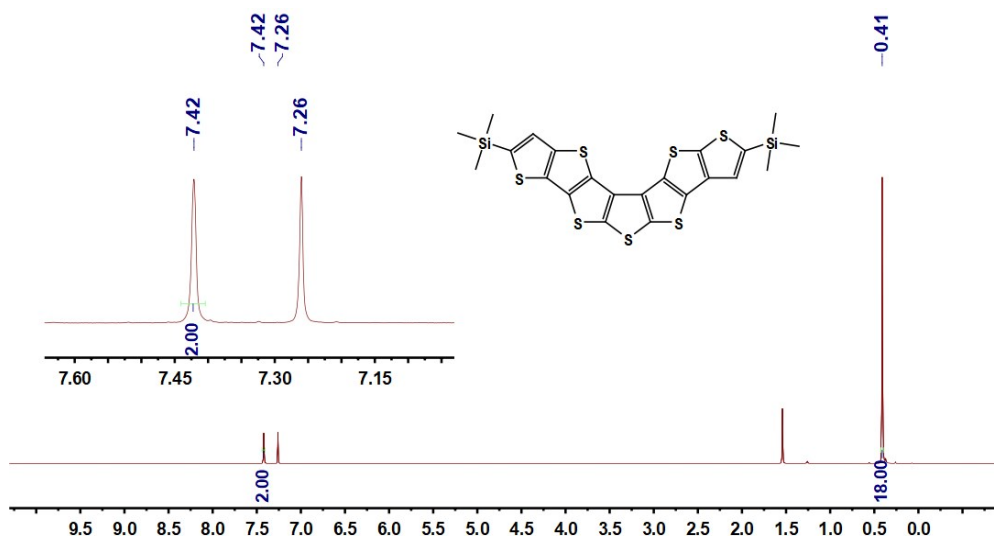

Figure S7. <sup>1</sup>H NMR (400 MHz, CDCl<sub>3</sub>) spectrum of 1

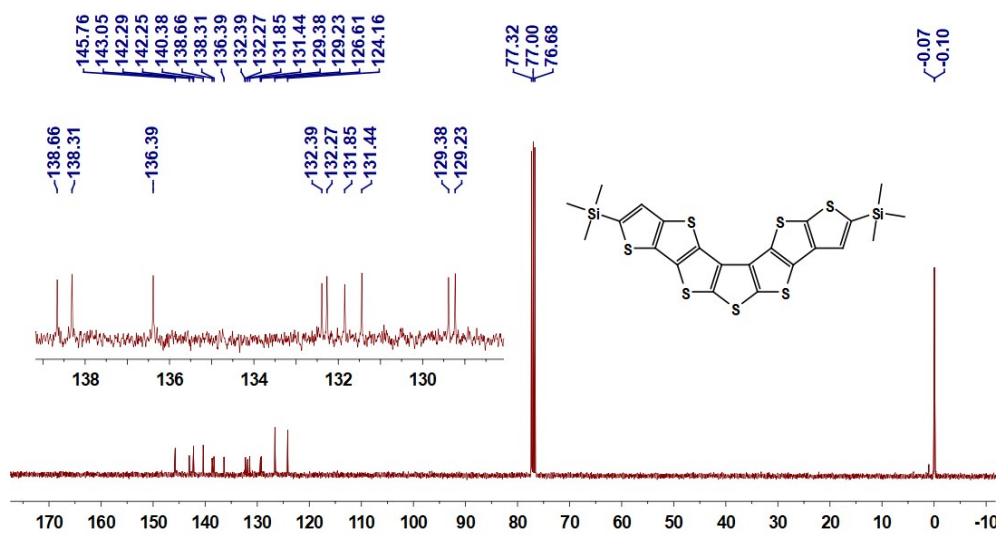

Figure S8. <sup>13</sup>C NMR (100 MHz, CDCl<sub>3</sub>) spectrum of 1

Instrument: Thermo Fisher Scientific LTQ FT Ultra

Card Serial Number: D20201231

Sample Serial Number: 1

Operator: DONG Date: 2020/06/01

Operation Mode: DART POSITIVE

Elemental composition search on mass 564.92

| m/z      | Theo. Mass | Delta (ppm) | RDB equiv. | Composition                                                    |
|----------|------------|-------------|------------|----------------------------------------------------------------|
| 564.9215 | 564.9221   | -1.14       | 14.5       | C <sub>22</sub> H <sub>21</sub> S <sub>7</sub> Si <sub>2</sub> |
|          | 564.9188   | 4.82        | 19.5       | C <sub>25</sub> H <sub>17</sub> S <sub>6</sub> Si <sub>2</sub> |

Figure S9. HRMS data of **1**

### NMR and HRMS spectra of **9**

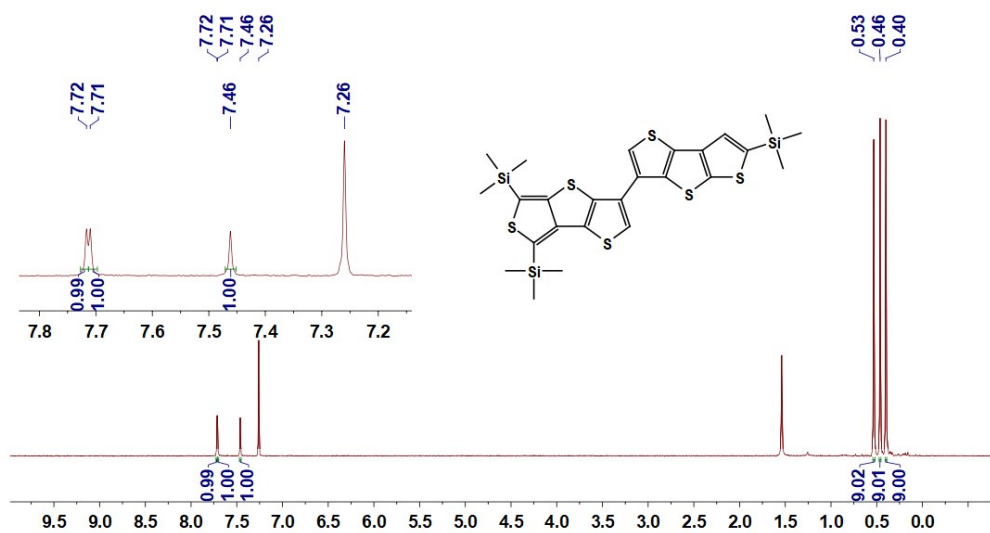

Figure S10. <sup>1</sup>H NMR (300 MHz, CDCl<sub>3</sub>) spectrum of **9**

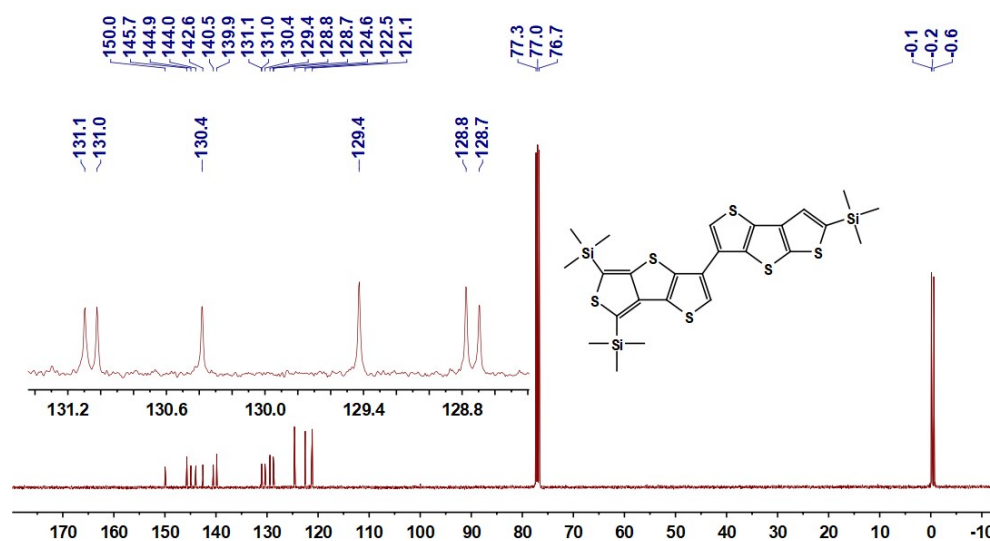

Figure S11. <sup>13</sup>C NMR (100 MHz, CDCl<sub>3</sub>) spectrum of **9**

Instrument: Thermo Scientific Q Exactive HF Orbitrap-FTMS

Card Serial Number: H-W200200

Sample Serial Number: 9

Operator: QHL Date: 2020/05/29

Operation Mode: ESI Positive Ion Mode

Elemental composition search on mass 607.01

m/z = 602.01-612.01

| m/z      | Theo. Mass | Delta (ppm) | RDB equiv. | Composition                                                                   |
|----------|------------|-------------|------------|-------------------------------------------------------------------------------|
| 607.0051 | 607.0052   | -0.17       | 13.5       | C <sub>25</sub> H <sub>31</sub> S <sub>6</sub> Si <sub>3</sub>                |
|          | 607.0032   | 3.13        | 14.5       | C <sub>26</sub> H <sub>28</sub> F <sub>2</sub> S <sub>6</sub> Si <sub>2</sub> |
|          | 607.0028   | 3.80        | 10.5       | C <sub>23</sub> H <sub>32</sub> NaS <sub>6</sub> Si <sub>3</sub>              |

Figure S12. HRMS data of 9

## NMR HRMS spectra of 2

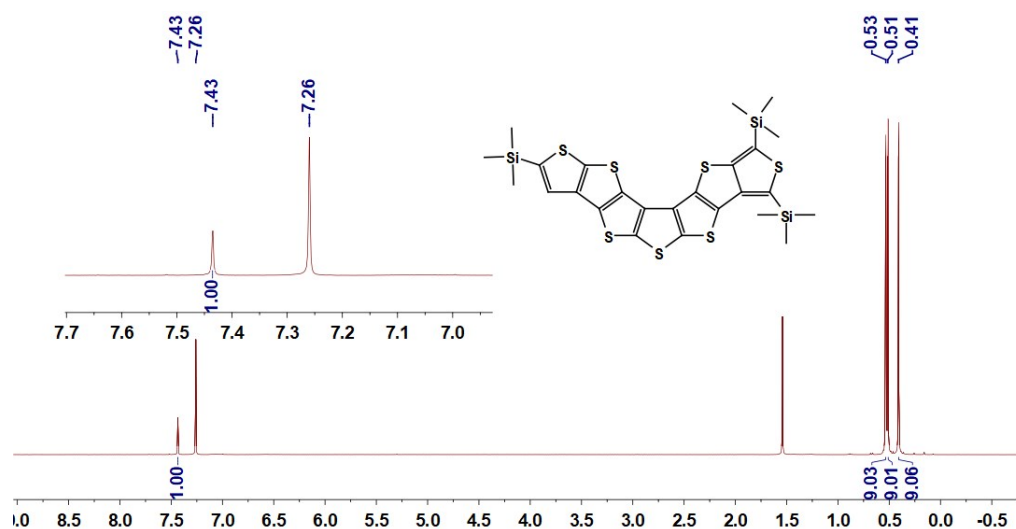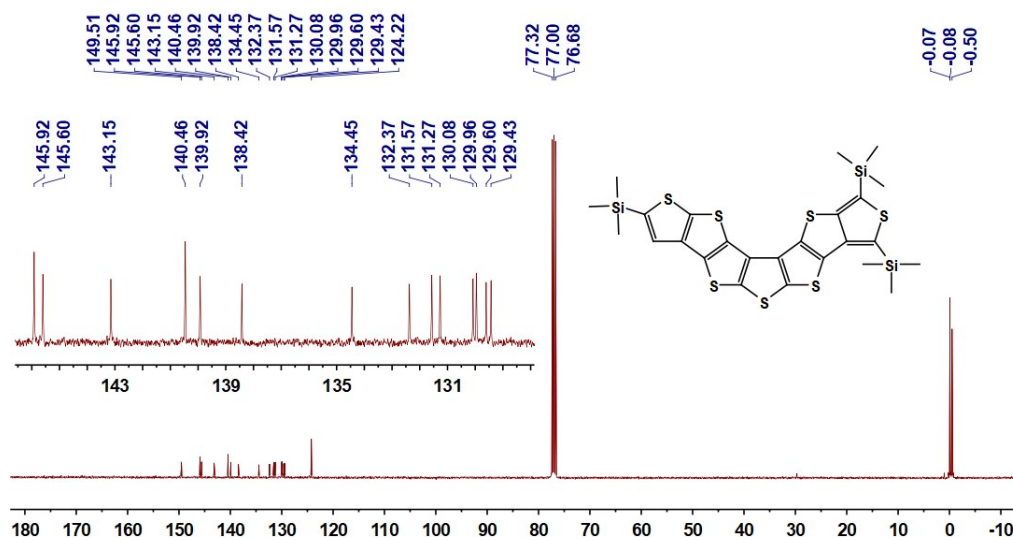

Instrument: Thermo Scientific Q Exactive HF Orbitrap-FTMS

Card Serial Number: H-W200198

Sample Serial Number: 2

Operator: QHL Date: 2020/05/29

Operation Mode: ESI Positive Ion Mode

Elemental composition search on mass 636.96

m/z = 631.96-641.96

| m/z      | Theo. Mass | Delta (ppm) | RDB equiv. | Composition                                                      |
|----------|------------|-------------|------------|------------------------------------------------------------------|
| 636.9614 | 636.9617   | -0.46       | 14.5       | C <sub>25</sub> H <sub>29</sub> S <sub>7</sub> Si <sub>3</sub>   |
|          | 636.9597   | 2.68        | 15.5       | C <sub>26</sub> H <sub>26</sub> FS <sub>7</sub> Si <sub>2</sub>  |
|          | 636.9592   | 3.32        | 11.5       | C <sub>23</sub> H <sub>30</sub> NaS <sub>7</sub> Si <sub>3</sub> |
|          | 636.9583   | 4.83        | 19.5       | C <sub>28</sub> H <sub>25</sub> S <sub>6</sub> Si <sub>3</sub>   |

Figure S15. HRMS data of **2**

### NMR and HRMS spectra of **10**

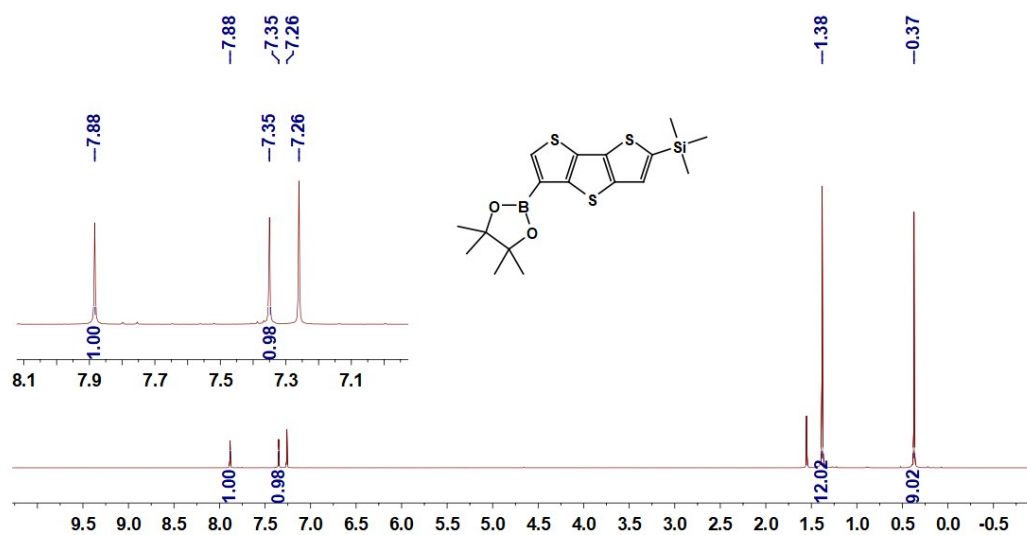

Figure S16. <sup>1</sup>H NMR (400 MHz, CDCl<sub>3</sub>) spectrum of **10**

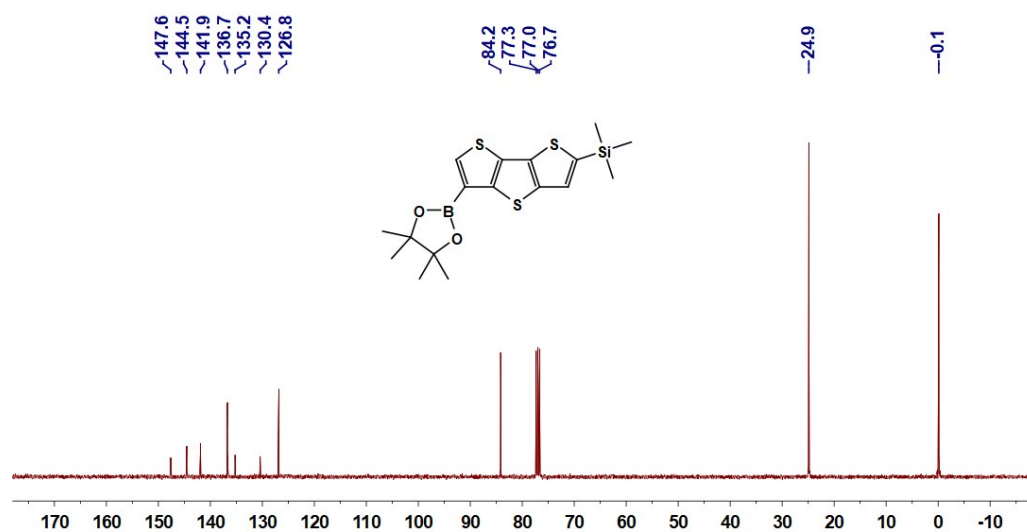

Figure S17. <sup>13</sup>C NMR (100 MHz, CDCl<sub>3</sub>) spectrum of **10**



Instrument: Thermo Fisher Scientific LTQ FTICR-MS

Card Serial Number: W181547

Sample Serial Number: ZC-7-9-col-pp

Operator: Songw Date: 2018/11/01

Operation Mode: DART Positive Ion Mode

Elemental composition search on mass 394.08

m/z= 389.08-399.08

| m/z      | Theo. Mass | Delta (ppm) | RDB equiv. | Composition                                                                        |
|----------|------------|-------------|------------|------------------------------------------------------------------------------------|
| 394.0831 | 394.0832   | -0.20       | 7.0        | C <sub>17</sub> H <sub>24</sub> O <sub>2</sub> <sup>10</sup> B S <sub>3</sub> Si   |
| 394.0836 | 394.0836   | -1.22       | 9.0        | C <sub>17</sub> H <sub>22</sub> O <sub>3</sub> N <sub>2</sub> S <sub>2</sub> Si    |
| 394.0838 | 394.0838   | -1.81       | 9.0        | C <sub>18</sub> H <sub>22</sub> O <sub>2</sub> N <sub>2</sub> S <sub>3</sub>       |
| 394.0850 | 394.0850   | -4.79       | 12.5       | C <sub>19</sub> H <sub>18</sub> O <sub>4</sub> N <sup>10</sup> B S <sub>3</sub> Si |

Figure S18. HRMS data of **10**

### NMR and HRMS spectra of **11**

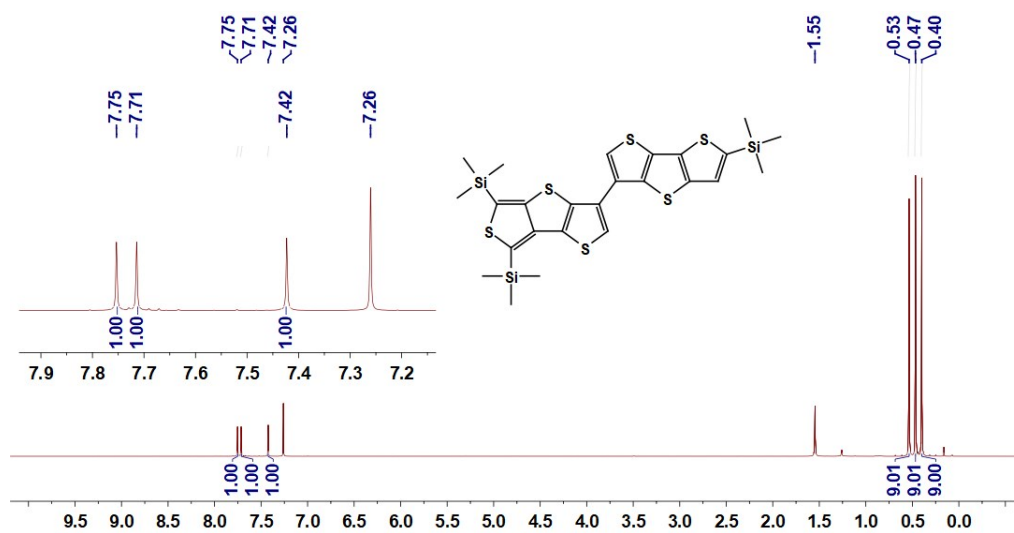

Figure S19. <sup>1</sup>H NMR (400 MHz, CDCl<sub>3</sub>) spectrum of **11**

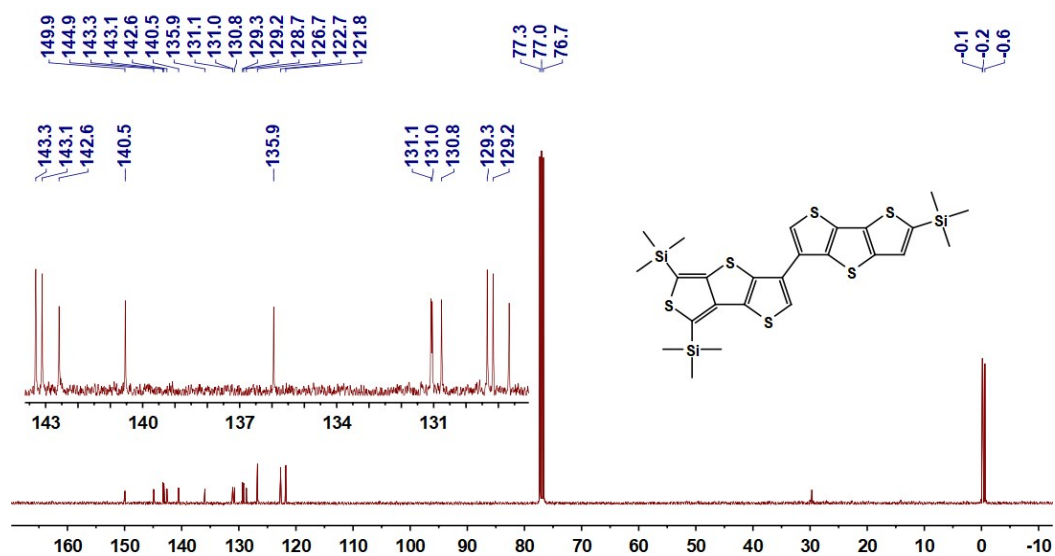

Figure S20. <sup>13</sup>C NMR (100 MHz, CDCl<sub>3</sub>) spectrum of **11**

Instrument: Thermo Scientific Q Exactive HF Orbitrap-FTMS

Card Serial Number: H-W200201

Sample Serial Number: 11

Operator: QHL Date: 2020/05/29

Operation Mode: ESI Positive Ion Mode

Elemental composition search on mass 607.00

| m/z      | Theo. Mass | Delta (ppm) | RDB equiv. | Composition                                                      |
|----------|------------|-------------|------------|------------------------------------------------------------------|
| 607.0046 | 607.0052   | -0.97       | 13.5       | C <sub>25</sub> H <sub>31</sub> S <sub>6</sub> Si <sub>3</sub>   |
|          | 607.0032   | 2.32        | 14.5       | C <sub>26</sub> H <sub>28</sub> F <sub>5</sub> Si <sub>2</sub>   |
|          | 607.0028   | 2.99        | 10.5       | C <sub>23</sub> H <sub>32</sub> NaS <sub>6</sub> Si <sub>3</sub> |
|          | 607.0019   | 4.58        | 18.5       | C <sub>28</sub> H <sub>27</sub> S <sub>5</sub> Si <sub>3</sub>   |

Figure S21. HRMS data of 11

### NMR and HRMS spectra of 3

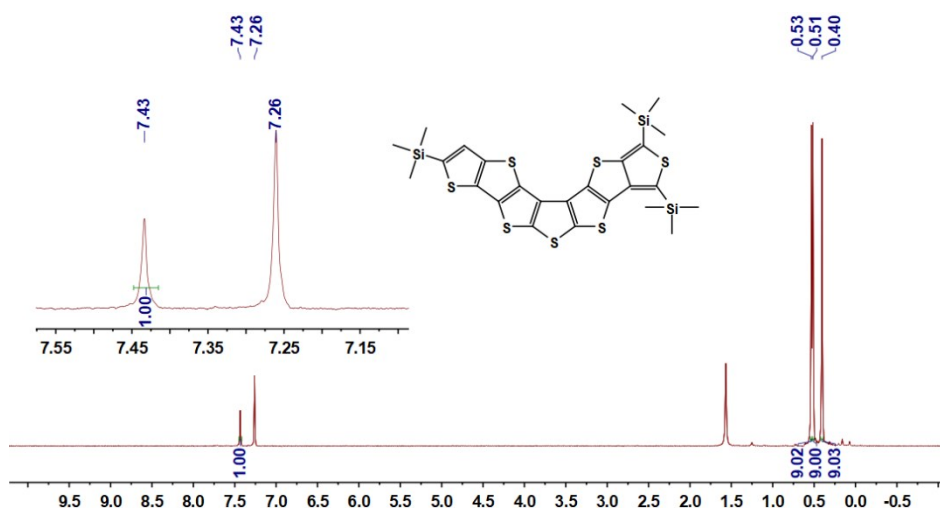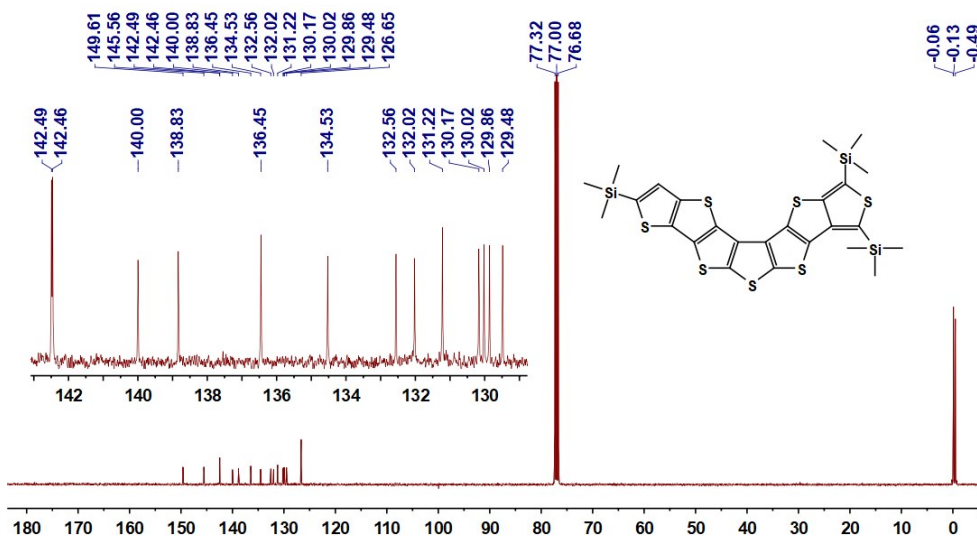

Instrument: Thermo Scientific Q Exactive HF Orbitrap-FTMS

Card Serial Number: H-W200199

Sample Serial Number: 3

Operator: QHL Date: 2020/05/29

Operation Mode: ESI Positive Ion Mode

Elemental composition search on mass 636.96

| m/z      | Theo. Mass | Delta (ppm) | RDB equiv. | Composition                                                      |
|----------|------------|-------------|------------|------------------------------------------------------------------|
| 631.96   | 631.96     |             |            |                                                                  |
| 636.9609 | 636.9612   | -0.47       | 15.5       | C <sub>26</sub> H <sub>25</sub> O <sub>3</sub> S <sub>7</sub> Si |
|          | 636.9617   | -1.12       | 14.5       | C <sub>25</sub> H <sub>29</sub> S <sub>7</sub> Si <sub>3</sub>   |
|          | 636.9583   | 4.17        | 19.5       | C <sub>28</sub> H <sub>25</sub> S <sub>6</sub> Si <sub>3</sub>   |
|          | 636.9581   | 4.46        | 20.5       | C <sub>30</sub> H <sub>21</sub> O <sub>2</sub> S <sub>7</sub>    |
|          | 636.9579   | 4.82        | 20.5       | C <sub>29</sub> H <sub>21</sub> O <sub>3</sub> S <sub>6</sub> Si |

Figure S24. HRMS data of **3**

<sup>1</sup>H NMR spectrum of **12**

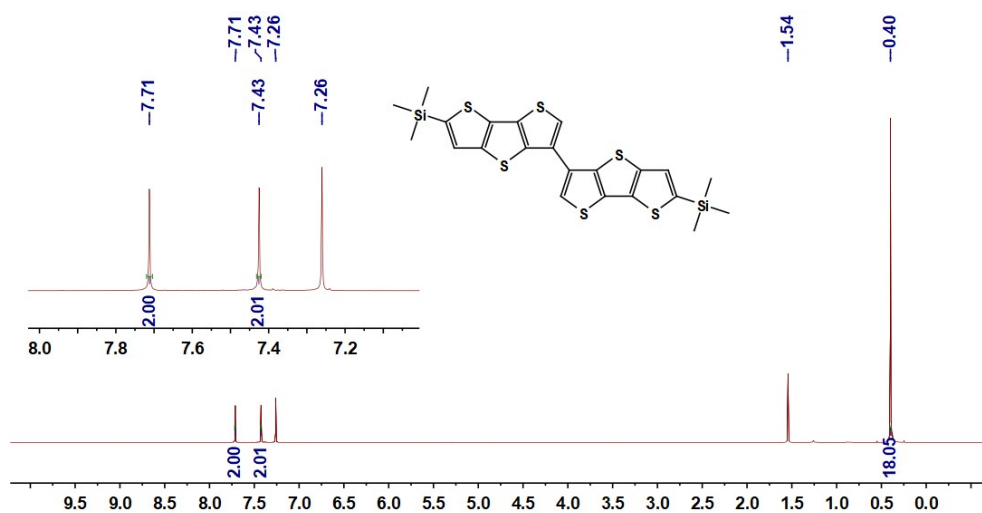

Figure S25. <sup>1</sup>H NMR (400 MHz, CDCl<sub>3</sub>) spectrum of **12**

NMR and HRMS spectra of **4**

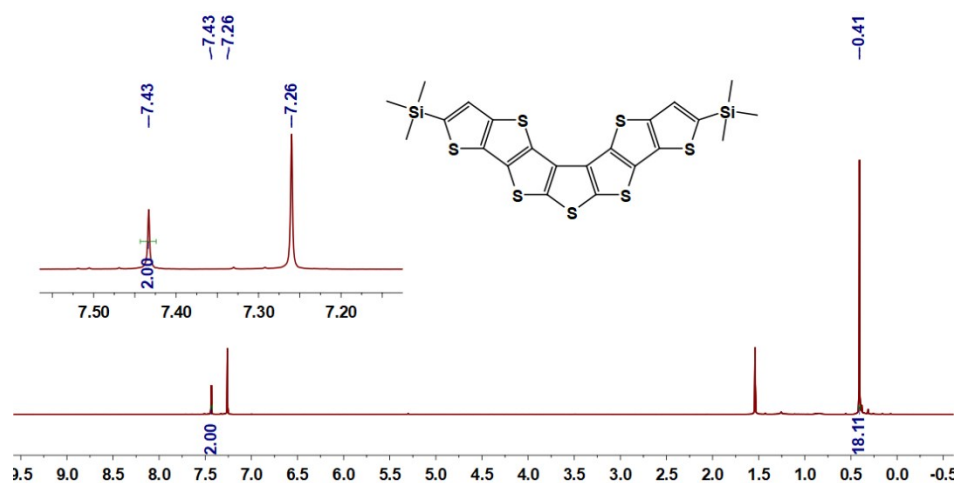

Figure S26. <sup>1</sup>H NMR (400 MHz, CDCl<sub>3</sub>) spectrum of **4**

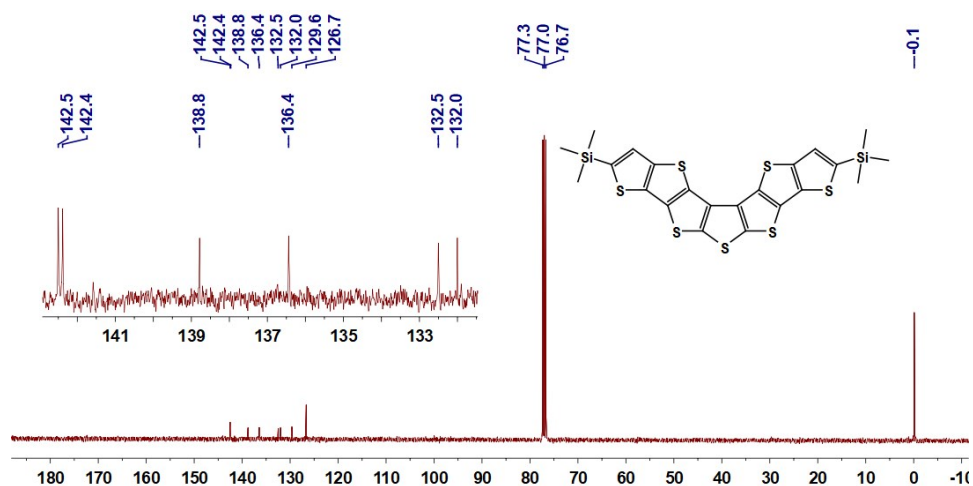

Figure S27.  $^{13}\text{C}$  NMR (100 MHz,  $\text{CDCl}_3$ ) spectrum of **4**

Instrument: Thermo Fisher Scientific LTQ FT Ultra

Card Serial Number : D20201233

Sample Serial Number: 4

Operator : DONG Date: 2020/06/01

Operation Mode: DART POSITIVE

Elemental composition search on mass 564.92

| m/z= 559.92-569.92 |            |             |            |                                                   |
|--------------------|------------|-------------|------------|---------------------------------------------------|
| m/z                | Theo. Mass | Delta (ppm) | RDB equiv. | Composition                                       |
| 564.9216           | 564.9221   | -0.98       | 14.5       | $\text{C}_{22}\text{H}_{21}\text{S}_7\text{Si}_2$ |
|                    | 564.9188   | 4.98        | 19.5       | $\text{C}_{25}\text{H}_{17}\text{S}_6\text{Si}_2$ |

Figure S28. HRMS data of **4**

#### 4. UV-vis absorption spectra of 1-4

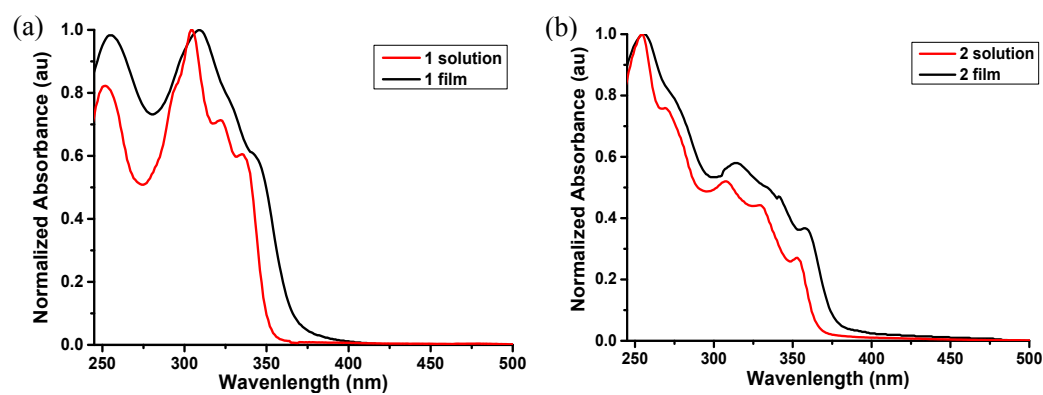

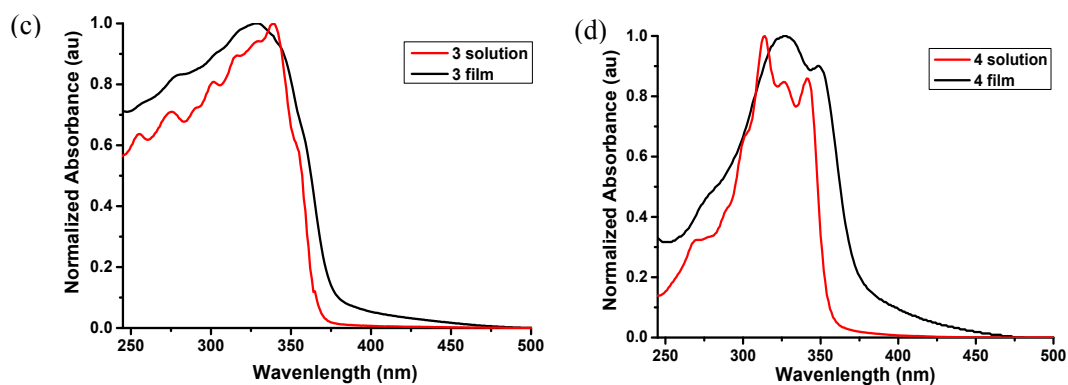

Figure S29. Normalized UV-vis absorption spectra of **1**(a), **2**(b), **3**(c) and **4**(d) in  $\text{CH}_2\text{Cl}_2$  and thin film.

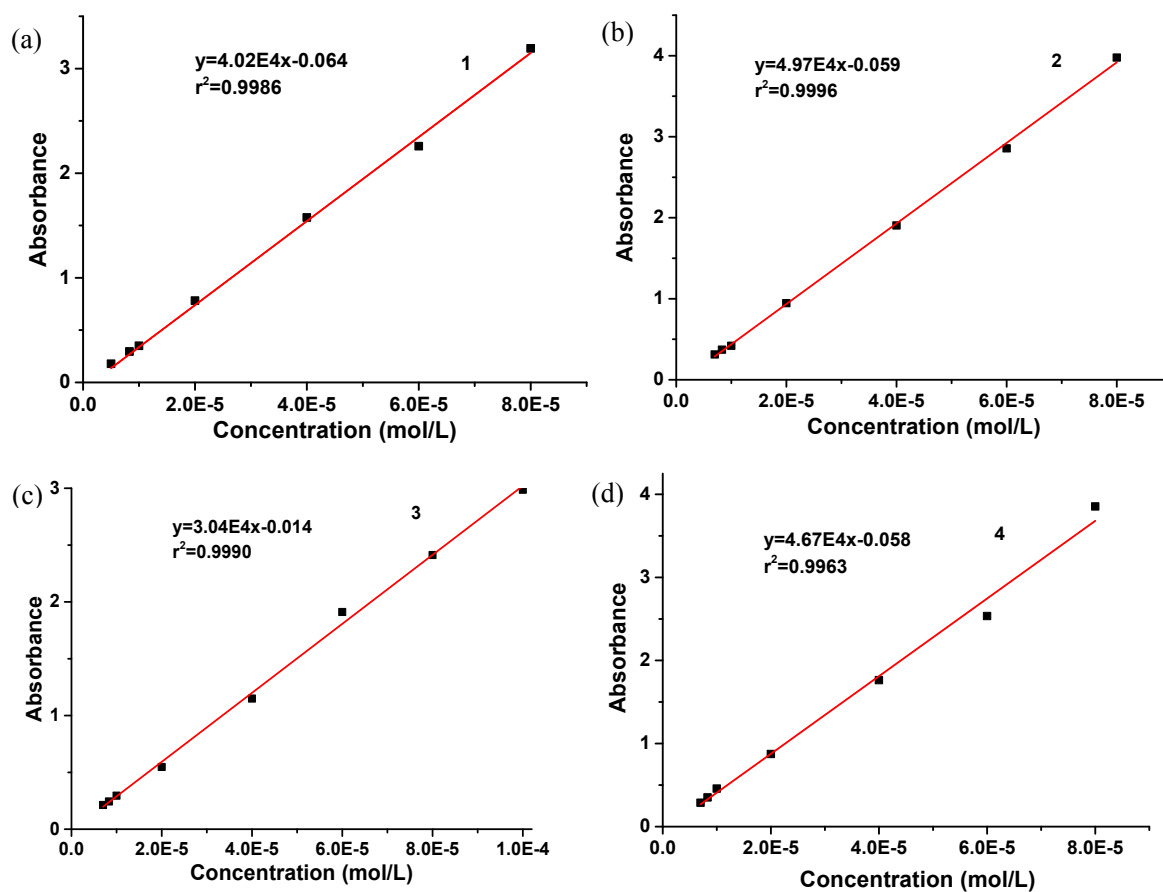

Figure S30. Beer-Lambert plots of **1**(a), **2**(b), **3**(c) and **4**(d) in  $\text{CH}_2\text{Cl}_2$  at room temperature.

## 5. XRD patterns of 1-4

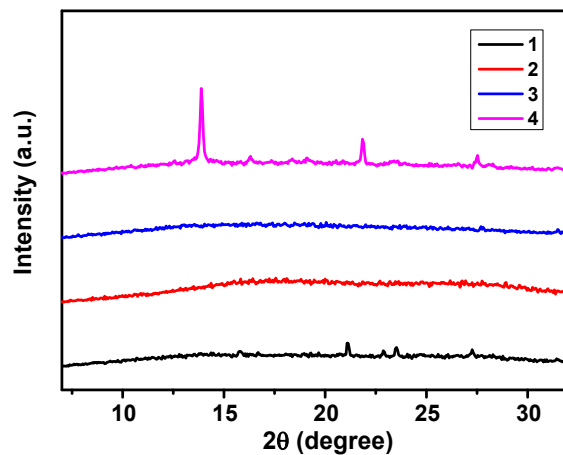

Figure S31. XRD patterns of **1-4** based on SiO<sub>2</sub>/Si substrate at room temperature.

## 6. Cyclic voltammetry of 1-4

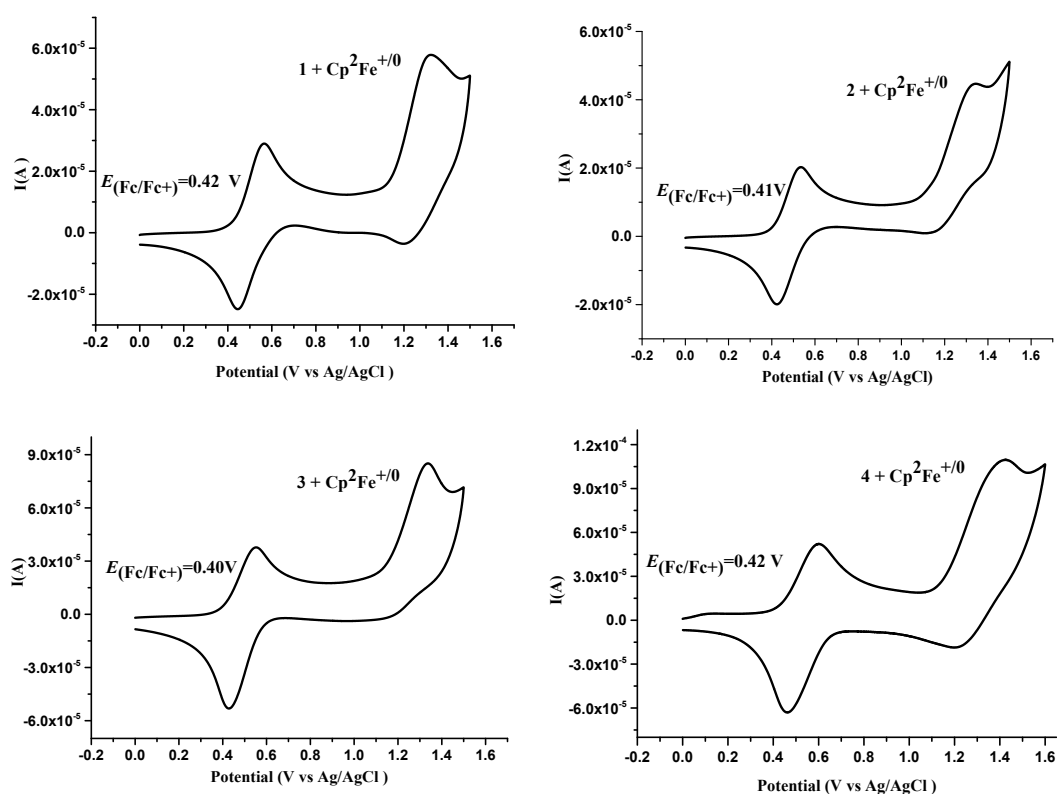

Figure S32. Cyclic voltammetry of **1-4** using Ag/AgCl as reference electrode and Fc/Fc<sup>+</sup> as internal standard, in CH<sub>2</sub>Cl<sub>2</sub> ([C] = 1 × 10<sup>-3</sup> M), at a scan rate of 100 mV/s with CH<sub>2</sub>Cl<sub>2</sub>/Bu<sub>4</sub>F<sub>6</sub>NP (0.1 M) as the supporting electrolyte.

## 7. Table S1. Photophysical and Electrochemical Data for 1-4

Table S1. Photophysical and Electrochemical Data for 1, 2, 3 and 4

| compound | $\lambda_{\text{abs}}$<br>max<br>(nm) | $\lambda_{\text{abs}}$<br>onset<br>(nm) | $\lambda_{\text{film}}$<br>max<br>(nm) | $\lambda_{\text{film}}$<br>onset<br>(nm) | $E_{\text{g}}$<br>(eV) | $E_{\text{ox}}$<br>(V) | HOMO<br>(eV) | LUMO<br>(eV) |
|----------|---------------------------------------|-----------------------------------------|----------------------------------------|------------------------------------------|------------------------|------------------------|--------------|--------------|
| 1        | 304                                   | 351                                     | 308                                    | 366                                      | 3.53                   | 1.14                   | -5.51        | -1.98        |
| 2        | 254                                   | 366                                     | 256                                    | 377                                      | 3.39                   | 1.12                   | -5.52        | -2.13        |
| 3        | 339                                   | 366                                     | 330                                    | 376                                      | 3.39                   | 1.15                   | -5.54        | -2.15        |
| 4        | 314                                   | 353                                     | 327                                    | 375                                      | 3.51                   | 1.14                   | -5.52        | -2.01        |

$$E_{\text{HOMO}} = - [E_{\text{ox}} - E_{(\text{Fc}/\text{Fc}^+)} + 4.8] \text{ eV}. E_{\text{LUMO}} = E_{\text{g}(\text{opt})} + E_{\text{HOMO}}$$

## 8. DFT calculations of 1-4 at the B3LYP/6-31G\*\* level of theory

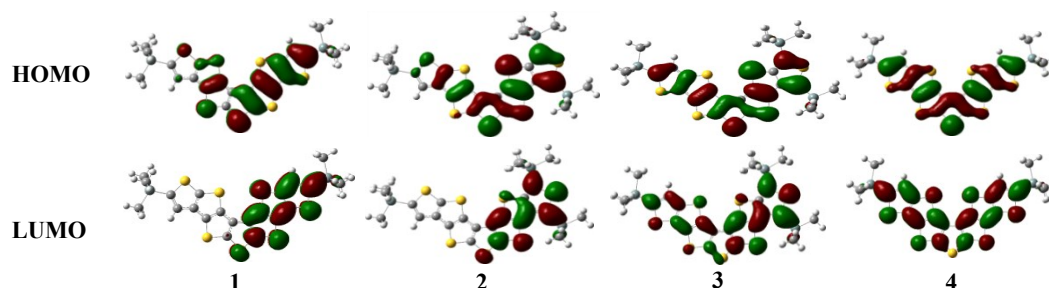

Figure S33. Isosurface map of the HOMO and LUMO for 1-4 calculated at B3LYP/6-31G\*\* level of theory.

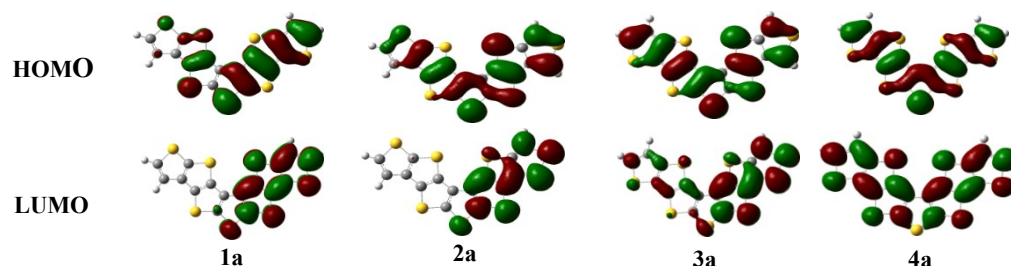

Figure S34. Isosurface map of the HOMO and LUMO for the isomeric position of sulfur atoms without TMS groups 1a-4a calculated at B3LYP/6-31G\*\* level of theory.

## 9. Table S2. Adiabatic ionization potentials, reorganization energy, and average mobility of 1-4

Table S2. Adiabatic ionization potentials, reorganization energy, and average mobility of 1-4

| Compounds                                               | 1    | 2    | 3    | 4    |
|---------------------------------------------------------|------|------|------|------|
| Adiabatic ionization potentials (AIP) <sup>a</sup> (eV) | 6.47 | 6.34 | 6.30 | 6.51 |
| Reorganization energy <sup>a</sup> (meV)                | 264  | 227  | 219  | 225  |
| Average mobility <sup>b</sup> (cm <sup>2</sup> /V·s)    | 0.05 | 0.46 | 1.61 | 0.65 |

- a: The adiabatic ionization potentials, reorganization energy are calculated at B3LYP/6-31G\*\* level of theory.
- b: The neutral and cation states associated with hole transfer process are optimized at B3LYP/6-31G\*\* level of theory.
- All the electronic structure calculations are using the Gaussian 09 program.

## 10. Table S3. Transfer integral a of 1-4

Table S3. Transfer integral<sup>a</sup> of 1-4

| Compounds | 1            |        | 2            |        | 3            |        | 4            |        |
|-----------|--------------|--------|--------------|--------|--------------|--------|--------------|--------|
|           | <i>d</i> (Å) | V(meV) |
| P1        | 5.10         | -3.02  | 4.55         | -49.02 | 6.38         | 46.22  | 6.34         | 20.81  |
| P2        | 6.11         | 5.85   | 6.64         | -17.88 | 6.38         | 46.22  | 6.34         | 20.81  |
| P3        | 6.11         | 5.85   | 6.64         | -17.88 | 7.30         | -3.42  | 6.34         | 20.81  |
| P4        | 8.11         | 0.82   | 7.64         | -1.61  | 8.30         | 56.95  | 6.34         | 20.81  |
| P5        | 8.11         | 0.82   | 7.64         | -1.61  | 8.42         | -0.23  | 8.09         | 9.02   |
| P6        | 8.49         | -0.22  | 9.70         | 4.69   | 9.42         | 3.21   | 8.09         | 9.02   |
| P7        | 10.56        | -23.69 | 11.54        | 5.57   | 12.17        | -0.29  | 17.03        | 0.84   |
| P8        | 17.03        | 0.19   | 11.54        | 5.57   | 14.34        | 0.19   | 17.03        | 0.84   |
| P9        | 17.03        | 0.19   | 19.58        | -0.02  | 16.88        | 0.77   | 18.34        | -0.88  |
| P10       | 18.83        | -0.02  | 19.58        | -0.02  | 17.56        | 0.16   | 18.34        | -0.88  |
| P11       | 19.13        | -0.46  | 20.02        | -0.04  | 18.96        | 0.97   | 20.11        | -1.10  |
| P12       | 19.13        | -0.44  | 20.02        | -0.04  | 18.96        | 0.97   | 20.11        | -1.10  |
| P13       | 20.01        | -0.02  | 20.40        | 0.05   | 19.13        | 0.03   | 21.58        | -0.43  |
| P14       | 21.58        | -0.22  | 20.67        | -0.14  | 20.54        | 0.20   | 21.58        | -0.43  |
| P15       | 21.58        | -0.22  | 20.67        | -0.14  | 20.54        | 0.20   |              |        |
| P16       |              |        | 21.27        | 0.05   |              |        |              |        |

a: The electronic structures for intermolecular transfer integral are calculated at PW91PW91/6-31G\*\* level of theory by using the G09 program.

## 11. Table S4. Total energies of optimized structures of 1-4

Table S4. Cartesian coordinates, the number of imaginary frequencies, and computed total energies of optimized structures at B3LYP/6-31G\*\* level of theory

| 1                                                                                  |    |             |             |             |
|------------------------------------------------------------------------------------|----|-------------|-------------|-------------|
| the number of imaginary frequencies = 0, $E_{\text{total}} = -4216.791556$ hartree |    |             |             |             |
| Cartesian coordinates                                                              | S  | -1.95069200 | -0.94533000 | 0.01061900  |
|                                                                                    | S  | -2.90094000 | 3.19054400  | 0.00201000  |
|                                                                                    | S  | 0.10737400  | 4.23620000  | -0.00415800 |
|                                                                                    | S  | 3.03667000  | 2.98158400  | -0.00770100 |
|                                                                                    | S  | 1.80898200  | -1.07831300 | 0.01716900  |
|                                                                                    | Si | -7.69597600 | -2.00963100 | -0.00734300 |
|                                                                                    | Si | 7.88895700  | -1.54285900 | -0.00575900 |
|                                                                                    | C  | -6.01489800 | -1.15255000 | -0.00091900 |
|                                                                                    | C  | -3.70507700 | -0.80238900 | 0.00700200  |



|   |             |             |             |
|---|-------------|-------------|-------------|
| C | -4.12782300 | 0.52467100  | 0.00537700  |
| C | -3.04079700 | 1.43922100  | 0.00640500  |
| C | -1.80223600 | 0.80501300  | 0.00902400  |
| C | -0.69949800 | 1.71513200  | 0.00708300  |
| C | -1.15923200 | 3.02900500  | 0.00292600  |
| C | 1.28882700  | 2.94374100  | -0.00153300 |
| C | 0.73959900  | 1.66534000  | 0.00521500  |
| C | 1.78079100  | 0.68384200  | 0.00652900  |
| C | 3.05755900  | 1.22461000  | -0.00064100 |
| C | 3.55770900  | -1.03534800 | 0.01134000  |
| C | 4.10319500  | 0.24643200  | 0.00086300  |
| C | 6.06615600  | -1.05071800 | -0.00512400 |
| C | -7.38311500 | -3.87287000 | -0.03440400 |
| H | -6.82439800 | -4.17710500 | -0.92552500 |
| H | -8.33437200 | -4.41637700 | -0.04109000 |
| H | -6.82251100 | -4.20289900 | 0.84632200  |
| C | -8.65576500 | -1.52773100 | 1.54833800  |
| H | -8.11670300 | -1.82483500 | 2.45372400  |
| H | -9.63846900 | -2.01241700 | 1.56762700  |
| H | -8.81900400 | -0.44601200 | 1.60063100  |
| C | -8.66381400 | -1.48378800 | -1.54366200 |
| H | -8.82760400 | -0.40106300 | -1.56474100 |
| H | -9.64656800 | -1.96790300 | -1.57145100 |
| H | -8.12945000 | -1.75509200 | -2.45985900 |
| C | 8.21771100  | -2.71661200 | -1.45034700 |
| H | 7.60685700  | -3.62309400 | -1.38031800 |
| H | 9.26835600  | -3.02748700 | -1.46958400 |
| H | 7.99120600  | -2.23832200 | -2.40871600 |
| C | 8.31657000  | -2.40012200 | 1.62372300  |
| H | 8.13490100  | -1.74006800 | 2.47807800  |
| H | 9.37191900  | -2.69474000 | 1.64464200  |
| H | 7.71683300  | -3.30459200 | 1.77089700  |
| C | 8.90342200  | 0.03969300  | -0.19933100 |
| H | 8.66237700  | 0.56270400  | -1.13038300 |
| H | 9.97290500  | -0.19717700 | -0.22076400 |
| H | 8.73789200  | 0.73310600  | 0.63173600  |
| S | -5.86366500 | 0.61183100  | -0.00042200 |
| S | 4.77597000  | -2.26554500 | 0.00903200  |
| C | -4.77005000 | -1.74349300 | 0.00336600  |
| H | -4.62887600 | -2.81811400 | 0.00323800  |
| C | 5.53316000  | 0.21601100  | -0.00885600 |
| H | 6.14941900  | 1.10826800  | -0.02005400 |

2

the number of imaginary frequencies = 0,  $E_{\text{total}} = -4625.483845$  hartree

|                       |            |             |             |             |
|-----------------------|------------|-------------|-------------|-------------|
| Cartesian coordinates | S          | 5.68054500  | 1.52197300  | -0.00758900 |
|                       | S          | 1.41208600  | 1.10054900  | 0.00427700  |
|                       | S          | 2.74860500  | -2.93541400 | 0.00293100  |
|                       | S          | -0.15449400 | -4.24323500 | -0.00028100 |
|                       | S          | -3.17901400 | -3.24249300 | -0.00474400 |
|                       | S          | -2.30501600 | 0.90776700  | 0.00981600  |
|                       | S          | -5.36252400 | 1.83526100  | 0.00241800  |
|                       | Si         | 3.75282300  | 4.06133400  | 0.00016100  |
|                       | Si         | 6.46934700  | -1.52324400 | -0.00172000 |
|                       | Si         | -8.40162200 | 0.84880300  | -0.00199500 |
|                       | C          | 4.07175200  | 2.19870200  | -0.00556800 |
|                       | C          | 3.18901500  | 1.14246800  | -0.00082800 |
|                       | C          | 3.78259800  | -0.17626500 | 0.00095400  |
|                       | C          | 5.17203800  | -0.14855700 | -0.00204900 |
|                       | C          | 2.74327700  | -1.17571100 | 0.00443400  |
|                       | C          | 1.45877800  | -0.66430400 | 0.00623200  |
|                       | C          | 0.43596400  | -1.66221700 | 0.00572900  |
|                       | C          | 1.00495100  | -2.93268500 | 0.00388400  |
|                       | C          | -1.44106800 | -3.05455400 | 0.00031600  |
|                       | C          | -1.00290100 | -1.73399100 | 0.00407200  |
|                       | C          | -2.12479700 | -0.84543200 | 0.00349800  |
|                       | C          | -3.35055900 | -1.49400500 | -0.00152300 |
|                       | C          | -4.04329600 | 0.71408100  | 0.00562600  |
|                       | C          | -4.47676700 | -0.60980200 | -0.00114300 |
|                       | C          | -5.90410900 | -0.70226100 | -0.00842200 |
|                       | H          | -6.44241300 | -1.64364700 | -0.01576900 |
|                       | C          | -6.54372500 | 0.51412400  | -0.00665300 |
|                       | C          | 5.41202500  | 4.95609800  | -0.12300400 |
|                       | H          | 5.94106000  | 4.70188300  | -1.04721400 |
|                       | H          | 5.25765000  | 6.04082500  | -0.11842700 |
|                       | H          | 6.07012800  | 4.71402100  | 0.71797600  |
|                       | C          | 2.87502200  | 4.52499500  | 1.60854600  |
|                       | H          | 3.50463100  | 4.30894000  | 2.47773400  |
|                       | H          | 2.63193600  | 5.59346000  | 1.62617800  |
|                       | H          | 1.94008000  | 3.96827700  | 1.73041300  |
|                       | C          | 2.66677600  | 4.49842800  | -1.48380600 |
|                       | H          | 1.71843200  | 3.95149000  | -1.46986400 |
|                       | H          | 2.43288600  | 5.56911400  | -1.48983300 |
|                       | H          | 3.17191100  | 4.25959900  | -2.42531700 |
|                       | C          | 8.18222800  | -0.72268000 | -0.00398100 |
| H                     | 8.34466900 | -0.09811600 | 0.88037300  |             |
| H                     | 8.95442800 | -1.50020800 | -0.00397200 |             |
| H                     | 8.34308500 | -0.09977500 | -0.88980300 |             |
| C                     | 6.27853500 | -2.58294500 | 1.55338800  |             |

|                                                                                    |            |              |             |             |
|------------------------------------------------------------------------------------|------------|--------------|-------------|-------------|
|                                                                                    | H          | 5.28662700   | -3.03929200 | 1.62784400  |
|                                                                                    | H          | 7.01763100   | -3.39238800 | 1.55731600  |
|                                                                                    | H          | 6.43489000   | -1.98218400 | 2.45532700  |
|                                                                                    | C          | 6.27618000   | -2.58659900 | -1.55404800 |
|                                                                                    | H          | 6.43153400   | -1.98798500 | -2.45759200 |
|                                                                                    | H          | 7.01482700   | -3.39643100 | -1.55717700 |
|                                                                                    | H          | 5.28391500   | -3.04256900 | -1.62613300 |
|                                                                                    | C          | -8.88914000  | 1.68845100  | 1.62007200  |
|                                                                                    | H          | -8.36443700  | 2.64071700  | 1.75146500  |
|                                                                                    | H          | -9.96487100  | 1.89616300  | 1.64566000  |
|                                                                                    | H          | -8.64827800  | 1.05659100  | 2.48110000  |
|                                                                                    | C          | -8.83868500  | 1.97247300  | -1.45779900 |
|                                                                                    | H          | -8.57503400  | 1.50574800  | -2.41235000 |
|                                                                                    | H          | -9.91285900  | 2.18876500  | -1.47446800 |
|                                                                                    | H          | -8.31033500  | 2.93023500  | -1.40074200 |
|                                                                                    | C          | -9.27985100  | -0.81593800 | -0.16939500 |
|                                                                                    | H          | -10.36579900 | -0.67110900 | -0.17763300 |
|                                                                                    | H          | -9.00743200  | -1.32437500 | -1.09989400 |
|                                                                                    | H          | -9.04497500  | -1.48606100 | 0.66411400  |
| <b>3</b>                                                                           |            |              |             |             |
| the number of imaginary frequencies = 0, $E_{\text{total}} = -4625.486741$ hartree |            |              |             |             |
| Cartesian<br>coordinates                                                           | S          | -5.59118500  | 1.67396300  | -0.00835600 |
|                                                                                    | S          | -1.34308100  | 1.08026600  | 0.00529900  |
|                                                                                    | S          | -2.84350500  | -2.89785700 | 0.00234200  |
|                                                                                    | S          | 0.00176500   | -4.32454700 | 0.00208000  |
|                                                                                    | S          | 3.06417200   | -3.45783000 | -0.00011300 |
|                                                                                    | S          | 2.36696200   | 0.72832400  | 0.00672300  |
|                                                                                    | S          | 6.17627700   | -1.06774600 | -0.00271600 |
|                                                                                    | Si         | -3.56305400  | 4.13332500  | 0.00377900  |
|                                                                                    | Si         | -6.50152900  | -1.33837200 | -0.00539300 |
|                                                                                    | Si         | 8.16878000   | 1.43095500  | -0.00484000 |
|                                                                                    | C          | -3.95636900  | 2.28511200  | -0.00518100 |
|                                                                                    | C          | -3.11681600  | 1.19410300  | -0.00060700 |
|                                                                                    | C          | -3.76352600  | -0.09929400 | 0.00033100  |
|                                                                                    | C          | -5.15080400  | -0.01557500 | -0.00328700 |
|                                                                                    | C          | -2.76566800  | -1.14000500 | 0.00370200  |
|                                                                                    | C          | -1.46123100  | -0.68136800 | 0.00610700  |
|                                                                                    | C          | -0.48038800  | -1.72078000 | 0.00603200  |
|                                                                                    | C          | -1.10167100  | -2.96645600 | 0.00437600  |
|                                                                                    | C          | 1.33608400   | -3.19157700 | 0.00279400  |
|                                                                                    | C          | 0.95461700   | -1.85289700 | 0.00507700  |
| C                                                                                  | 2.11031700 | -1.01002800  | 0.00467400  |             |
| C                                                                                  | 3.30837000 | -1.71837700  | 0.00169500  |             |
| C                                                                                  | 4.44947500 | -0.87276300  | 0.00057500  |             |

|                                                                                    |   |             |             |             |
|------------------------------------------------------------------------------------|---|-------------|-------------|-------------|
|                                                                                    | C | 4.10906800  | 0.47760000  | 0.00318300  |
|                                                                                    | C | 5.23063000  | 1.35091800  | 0.00269800  |
|                                                                                    | H | 5.15733600  | 2.43228400  | 0.00490300  |
|                                                                                    | C | 6.43645300  | 0.68400800  | -0.00066000 |
|                                                                                    | C | -2.44363100 | 4.52556100  | -1.46801900 |
|                                                                                    | H | -2.94825000 | 4.30804900  | -2.41495800 |
|                                                                                    | H | -2.16587500 | 5.58576100  | -1.47082100 |
|                                                                                    | H | -1.51881000 | 3.94009000  | -1.44452100 |
|                                                                                    | C | -2.68583000 | 4.56345900  | 1.62176500  |
|                                                                                    | H | -1.77399700 | 3.97170400  | 1.75346000  |
|                                                                                    | H | -2.40289700 | 5.62202400  | 1.64242800  |
|                                                                                    | H | -3.33251000 | 4.37128800  | 2.48401000  |
|                                                                                    | C | -5.18293300 | 5.09477100  | -0.13891700 |
|                                                                                    | H | -5.85805700 | 4.88445800  | 0.69710100  |
|                                                                                    | H | -4.98356800 | 6.17215800  | -0.13794600 |
|                                                                                    | H | -5.71367700 | 4.85820200  | -1.06680300 |
|                                                                                    | C | -8.18145300 | -0.47105400 | -0.00707900 |
|                                                                                    | H | -8.31694000 | 0.15953300  | -0.89170600 |
|                                                                                    | H | -8.98398500 | -1.21722700 | -0.00902900 |
|                                                                                    | H | -8.31946500 | 0.15771200  | 0.87845100  |
|                                                                                    | C | -6.35261800 | -2.40595300 | 1.54874200  |
|                                                                                    | H | -6.49091400 | -1.80071000 | 2.45065700  |
|                                                                                    | H | -7.11923400 | -3.18940100 | 1.54990800  |
|                                                                                    | H | -5.37737900 | -2.89636500 | 1.62612000  |
|                                                                                    | C | -6.34880900 | -2.40510900 | -1.55976300 |
|                                                                                    | H | -5.37389400 | -2.89668100 | -1.63400000 |
|                                                                                    | H | -7.11644000 | -3.18754900 | -1.56414800 |
|                                                                                    | H | -6.48313500 | -1.79906900 | -2.46174400 |
|                                                                                    | H | 8.55191100  | 1.23783100  | -2.47175200 |
|                                                                                    | H | 10.09106300 | 1.32548200  | -1.60029200 |
|                                                                                    | C | 7.98234600  | 3.31114900  | 0.04032200  |
|                                                                                    | H | 7.45768600  | 3.64598400  | 0.94113100  |
|                                                                                    | H | 8.96906400  | 3.78735900  | 0.03812000  |
|                                                                                    | H | 7.43489000  | 3.68677900  | -0.83039100 |
|                                                                                    | C | 9.08073900  | 0.90172200  | -1.57398600 |
|                                                                                    | H | 9.17672600  | -0.18755700 | -1.63497900 |
|                                                                                    | C | 9.11569200  | 0.82934600  | 1.51667200  |
|                                                                                    | H | 9.21181900  | -0.26165900 | 1.52523900  |
|                                                                                    | H | 10.12702200 | 1.25084200  | 1.53940300  |
|                                                                                    | H | 8.60802100  | 1.12371800  | 2.44087900  |
| <b>4</b>                                                                           |   |             |             |             |
| the number of imaginary frequencies = 0, $E_{\text{total}} = -4216.794548$ hartree |   |             |             |             |
| Cartesian<br>coordinates                                                           | S | 5.84333900  | 0.50273000  | 0.00016600  |
|                                                                                    | S | 1.87962500  | -0.92085500 | -0.00050400 |

|    |             |             |             |
|----|-------------|-------------|-------------|
| S  | 2.97070000  | 3.18036200  | 0.00008400  |
| Si | 7.58703000  | -2.17684600 | 0.00012400  |
| C  | 5.93456000  | -1.26578800 | -0.00005800 |
| C  | 4.67040400  | -1.81423100 | -0.00034600 |
| H  | 4.49294700  | -2.88345500 | -0.00063400 |
| C  | 3.63787400  | -0.83746900 | -0.00033600 |
| C  | 4.10554900  | 0.47438700  | -0.00001100 |
| C  | 3.05025100  | 1.42527100  | 0.00027500  |
| C  | 1.79073300  | 0.83360500  | 0.00007200  |
| C  | 0.72009300  | 1.78131300  | -0.00021500 |
| C  | 1.22466300  | 3.07849000  | -0.00025400 |
| C  | 7.21478800  | -4.02934700 | -0.00034900 |
| H  | 6.64617900  | -4.32835000 | -0.88699300 |
| H  | 8.14812000  | -4.60310800 | 0.00053800  |
| H  | 6.64439700  | -4.32855500 | 0.88506000  |
| C  | 8.56563900  | -1.70415500 | 1.54680800  |
| H  | 8.02114100  | -1.97480100 | 2.45723400  |
| H  | 9.53411200  | -2.21655600 | 1.56919600  |
| H  | 8.76016300  | -0.62705700 | 1.58581700  |
| C  | 8.56630600  | -1.70379300 | -1.54601600 |
| H  | 8.76320900  | -0.62706100 | -1.58348500 |
| H  | 9.53362700  | -2.21830200 | -1.56937800 |
| H  | 8.02097800  | -1.97186500 | -2.45670700 |
| S  | -5.84333900 | 0.50273000  | -0.00026300 |
| S  | -1.87962500 | -0.92085500 | -0.00006700 |
| S  | -2.97070000 | 3.18036200  | -0.00000700 |
| Si | -7.58703000 | -2.17684600 | 0.00014200  |
| C  | -5.93456000 | -1.26578800 | 0.00004200  |
| C  | -4.67040400 | -1.81423100 | 0.00006000  |
| H  | -4.49294700 | -2.88345500 | 0.00025900  |
| C  | -3.63787400 | -0.83746900 | 0.00000300  |
| C  | -4.10554900 | 0.47438700  | -0.00014600 |
| C  | -3.05025100 | 1.42527100  | -0.00038000 |
| C  | -1.79073300 | 0.83360500  | -0.00030900 |
| C  | -0.72009300 | 1.78131300  | 0.00013300  |
| C  | -1.22466300 | 3.07849000  | 0.00039100  |
| C  | -7.21478800 | -4.02934700 | 0.00054600  |
| H  | -6.64602800 | -4.32835200 | 0.88709300  |
| H  | -8.14812000 | -4.60310800 | -0.00018300 |
| H  | -6.64454700 | -4.32855300 | -0.88496000 |
| C  | -8.56590100 | -1.70415200 | -1.54637500 |
| H  | -8.02155700 | -1.97479600 | -2.45689500 |
| H  | -9.53437700 | -2.21655400 | -1.56859900 |
| H  | -8.76043100 | -0.62705400 | -1.58534900 |

|                                                                                    |             |             |             |             |
|------------------------------------------------------------------------------------|-------------|-------------|-------------|-------------|
|                                                                                    | C           | -8.56604500 | -1.70379500 | 1.54644900  |
|                                                                                    | H           | -8.76294200 | -0.62706400 | 1.58395400  |
|                                                                                    | H           | -9.53336300 | -2.21830400 | 1.56997400  |
|                                                                                    | H           | -8.02056200 | -1.97186900 | 2.45704600  |
|                                                                                    | S           | 0.00000000  | 4.32868300  | 0.00017600  |
| <b>1a</b>                                                                          |             |             |             |             |
| the number of imaginary frequencies = 0, $E_{\text{total}} = -3399.398290$ hartree |             |             |             |             |
| Cartesian<br>coordinates                                                           | S           | 1.76738200  | -1.82640000 | -0.00021900 |
|                                                                                    | S           | 3.04259600  | 2.22077200  | -0.00020600 |
|                                                                                    | S           | 0.12762500  | 3.50347600  | -0.00009700 |
|                                                                                    | S           | -2.89222600 | 2.48794000  | 0.00018600  |
|                                                                                    | S           | -1.99194400 | -1.65658700 | -0.00024800 |
|                                                                                    | C           | 5.77478400  | -2.32738600 | 0.00022500  |
|                                                                                    | C           | 3.52562900  | -1.82443500 | 0.00003200  |
|                                                                                    | C           | 4.05212200  | -0.53530300 | 0.00003600  |
|                                                                                    | C           | 3.04224300  | 0.46417200  | -0.00004300 |
|                                                                                    | C           | 1.75769900  | -0.06961500 | -0.00009000 |
|                                                                                    | C           | 0.73061500  | 0.92571700  | -0.00010500 |
|                                                                                    | C           | 1.29343200  | 2.19864400  | -0.00010400 |
|                                                                                    | C           | -1.15304800 | 2.30974700  | -0.00012300 |
|                                                                                    | C           | -0.70773200 | 0.99149400  | -0.00013000 |
|                                                                                    | C           | -1.82410200 | 0.09647100  | 0.00012500  |
|                                                                                    | C           | -3.05359900 | 0.73824300  | 0.00029200  |
|                                                                                    | C           | -3.73116500 | -1.47346900 | -0.00025800 |
|                                                                                    | C           | -4.17363600 | -0.15263200 | 0.00006600  |
|                                                                                    | C           | -6.19469600 | -1.29370800 | 0.00050200  |
|                                                                                    | S           | 5.79268200  | -0.57562000 | 0.00028700  |
| S                                                                                  | -5.03915000 | -2.61278300 | -0.00024000 |             |
| C                                                                                  | 4.51270400  | -2.85160700 | 0.00024400  |             |
| H                                                                                  | 4.30379100  | -3.91425600 | 0.00025200  |             |
| C                                                                                  | -5.60415600 | -0.06518500 | 0.00044200  |             |
| H                                                                                  | -6.16219300 | 0.86362100  | 0.00069800  |             |
| H                                                                                  | 6.71443800  | -2.86147200 | 0.00023900  |             |
| H                                                                                  | -7.25004500 | -1.52755700 | 0.00074300  |             |
| <b>2a</b>                                                                          |             |             |             |             |
| the number of imaginary frequencies = 0, $E_{\text{total}} = -3399.394454$ hartree |             |             |             |             |
| Cartesian<br>coordinates                                                           | S           | 6.11304100  | -1.89905900 | -0.00009600 |
|                                                                                    | S           | 1.79848700  | -1.71228000 | 0.00006700  |
|                                                                                    | S           | 2.94893400  | 2.38890600  | -0.00004400 |
|                                                                                    | S           | -0.00994000 | 3.56473600  | -0.00006000 |
|                                                                                    | S           | -2.98787500 | 2.43416200  | 0.00001100  |
|                                                                                    | S           | -1.93313200 | -1.67368400 | -0.00010800 |
|                                                                                    | S           | -4.94267300 | -2.74226100 | -0.00025000 |
|                                                                                    | C           | 4.53580400  | -2.62821500 | 0.00019700  |

|                                                                                    |            |             |             |             |
|------------------------------------------------------------------------------------|------------|-------------|-------------|-------------|
|                                                                                    | C          | 3.57210100  | -1.66132100 | 0.00009300  |
|                                                                                    | C          | 4.09515400  | -0.31135700 | 0.00007400  |
|                                                                                    | C          | 5.46857800  | -0.29008800 | 0.00013100  |
|                                                                                    | C          | 3.01317500  | 0.63556300  | 0.00001000  |
|                                                                                    | C          | 1.75767200  | 0.05957400  | 0.00000000  |
|                                                                                    | C          | 0.69196100  | 1.01159800  | 0.00000700  |
|                                                                                    | C          | 1.20578600  | 2.30678100  | 0.00002200  |
|                                                                                    | C          | -1.24349300 | 2.32128500  | -0.00017200 |
|                                                                                    | C          | -0.74853200 | 1.02111200  | -0.00009900 |
|                                                                                    | C          | -1.83046200 | 0.08436700  | 0.00014100  |
|                                                                                    | C          | -3.08319700 | 0.67984400  | 0.00018600  |
|                                                                                    | C          | -3.67791100 | -1.55514400 | -0.00020000 |
|                                                                                    | C          | -4.16941700 | -0.25181800 | -0.00002500 |
|                                                                                    | C          | -5.60221900 | -0.21751100 | 0.00023100  |
|                                                                                    | H          | -6.19439000 | 0.68991600  | 0.00038600  |
|                                                                                    | C          | -6.14654700 | -1.46715400 | 0.00043100  |
|                                                                                    | H          | -7.19246500 | -1.74016000 | 0.00068400  |
|                                                                                    | H          | 4.43128500  | -3.70301500 | 0.00028400  |
|                                                                                    | H          | 6.13537900  | 0.55983500  | 0.00017400  |
| <b>3a</b>                                                                          |            |             |             |             |
| the number of imaginary frequencies = 0, $E_{\text{total}} = -3399.397174$ hartree |            |             |             |             |
| Cartesian<br>coordinates                                                           | S          | -6.22639400 | -1.71557400 | -0.00061500 |
|                                                                                    | S          | -1.90760300 | -1.71915700 | 0.00023000  |
|                                                                                    | S          | -2.87711500 | 2.42863000  | 0.00005700  |
|                                                                                    | S          | 0.13003100  | 3.47396400  | -0.00006600 |
|                                                                                    | S          | 3.05592600  | 2.21879900  | -0.00005800 |
|                                                                                    | S          | 1.82292400  | -1.84142500 | 0.00012800  |
|                                                                                    | S          | 5.83492500  | -0.54754100 | 0.00000500  |
|                                                                                    | C          | -4.68273500 | -2.51346400 | 0.00038300  |
|                                                                                    | C          | -3.67726900 | -1.59004600 | 0.00016300  |
|                                                                                    | C          | -4.14047600 | -0.21845500 | 0.00013600  |
|                                                                                    | C          | -5.51165200 | -0.13649800 | 0.00031600  |
|                                                                                    | C          | -3.01787000 | 0.67983300  | 0.00008100  |
|                                                                                    | C          | -1.78885700 | 0.04914500  | 0.00007500  |
|                                                                                    | C          | -0.68260400 | 0.95379200  | 0.00003200  |
|                                                                                    | C          | -1.13942300 | 2.27011000  | 0.00000500  |
|                                                                                    | C          | 1.30750500  | 2.17844600  | -0.00004900 |
|                                                                                    | C          | 0.75716000  | 0.90041100  | 0.00000400  |
|                                                                                    | C          | 1.79420800  | -0.08490300 | 0.00001800  |
|                                                                                    | C          | 3.07327100  | 0.46251900  | -0.00003700 |
|                                                                                    | C          | 4.09397800  | -0.52574400 | -0.00003500 |
| C                                                                                  | 3.58087700 | -1.82019800 | 0.00001200  |             |
| C                                                                                  | 4.57883300 | -2.83686100 | -0.00005000 |             |
| H                                                                                  | 4.38109600 | -3.90165100 | -0.00005500 |             |

|                                                                                    |             |             |             |             |
|------------------------------------------------------------------------------------|-------------|-------------|-------------|-------------|
|                                                                                    | C           | 5.83529800  | -2.29942300 | -0.00029200 |
|                                                                                    | H           | -4.62586200 | -3.59183400 | 0.00059000  |
|                                                                                    | H           | -6.14037800 | 0.74194400  | 0.00046700  |
|                                                                                    | H           | 6.78055400  | -2.82356800 | -0.00049200 |
| <b>4a</b>                                                                          |             |             |             |             |
| the number of imaginary frequencies = 0, $E_{\text{total}} = -3399.401009$ hartree |             |             |             |             |
| Cartesian<br>coordinates                                                           | S           | 5.84516500  | -0.39884500 | -0.00005700 |
|                                                                                    | S           | 1.88051500  | -1.83123600 | -0.00009200 |
|                                                                                    | S           | 2.97058400  | 2.26973900  | 0.00002400  |
|                                                                                    | C           | 5.90649300  | -2.14952400 | -0.00011800 |
|                                                                                    | C           | 4.66950400  | -2.73038500 | -0.00015900 |
|                                                                                    | H           | 4.50909900  | -3.80144600 | -0.00020700 |
|                                                                                    | C           | 3.63680100  | -1.74914800 | -0.00013100 |
|                                                                                    | C           | 4.10447700  | -0.43748800 | -0.00007500 |
|                                                                                    | C           | 3.05010700  | 0.51495100  | 0.00001500  |
|                                                                                    | C           | 1.79113500  | -0.07685200 | 0.00000500  |
|                                                                                    | C           | 0.72002400  | 0.87079800  | -0.00001100 |
|                                                                                    | C           | 1.22430700  | 2.16790600  | -0.00001100 |
|                                                                                    | S           | -5.84516500 | -0.39884500 | 0.00000100  |
|                                                                                    | S           | -1.88051500 | -1.83123600 | 0.00001100  |
|                                                                                    | S           | -2.97058400 | 2.26973900  | 0.00013000  |
|                                                                                    | C           | -5.90649300 | -2.14952400 | -0.00002800 |
|                                                                                    | C           | -4.66950400 | -2.73038500 | -0.00003000 |
|                                                                                    | H           | -4.50909900 | -3.80144600 | -0.00004600 |
|                                                                                    | C           | -3.63680100 | -1.74914800 | 0.00002200  |
|                                                                                    | C           | -4.10447700 | -0.43748800 | 0.00004400  |
| C                                                                                  | -3.05010700 | 0.51495100  | 0.00002600  |             |
| C                                                                                  | -1.79113500 | -0.07685200 | 0.00000700  |             |
| C                                                                                  | -0.72002400 | 0.87079800  | 0.00007400  |             |
| C                                                                                  | -1.22430700 | 2.16790600  | 0.00014300  |             |
| S                                                                                  | 0.00000000  | 3.41826000  | 0.00009500  |             |
| H                                                                                  | -6.86934700 | -2.64070400 | -0.00003200 |             |
| H                                                                                  | 6.86934700  | -2.64070400 | -0.00014100 |             |

<sup>a</sup> The total energies of optimized structures

## 12. X-ray crystallographic data

Completed crystal data for **1**

Table S5. Crystal data and structure refinement for **1**

|                     |                                                   |
|---------------------|---------------------------------------------------|
| Identification code | <b>1</b>                                          |
| Empirical formula   | $\text{C}_{22}\text{H}_{20}\text{S}_7\text{Si}_2$ |
| Formula weight      | 564.98                                            |



|                                               |                                                                          |
|-----------------------------------------------|--------------------------------------------------------------------------|
| Temperature/K                                 | 99.97                                                                    |
| Crystal system, Space group                   | Monoclinic, $P2_1/c$                                                     |
|                                               | $a = 17.0321(11) \text{ \AA}$ $\alpha = 90^\circ$                        |
|                                               | $b = 8.1148(5) \text{ \AA}$ $\beta = 103.715(2)^\circ$                   |
|                                               | $c = 19.0432(12) \text{ \AA}$ $\gamma = 90^\circ$                        |
| Volume                                        | $2557.0(3) \text{ \AA}^3$                                                |
| Z                                             | 4                                                                        |
| $\rho_{\text{calc}}$                          | $1.468 \text{ g/cm}^3$                                                   |
| $\mu$                                         | $0.721 \text{ mm}^{-1}$                                                  |
| F(000)                                        | 1168.0                                                                   |
| Crystal size                                  | $0.12 \times 0.1 \times 0.08 \text{ mm}^3$                               |
| Radiation                                     | MoK $\alpha$ ( $\lambda = 0.71073$ )                                     |
| $2\theta$ range for data collection           | $4.404$ to $55.554^\circ$                                                |
| Index ranges                                  | $-22 \leq h \leq 22$ , $-10 \leq k \leq 10$ , $-24 \leq l \leq 24$       |
| Reflections collected                         | 30270                                                                    |
| Independent reflections                       | 5981 [ $R_{\text{int}} = 0.0494$ ], 5981 [ $R_{\text{sigma}} = 0.0422$ ] |
| Data/restraints/parameters                    | 5981 / 19 / 299                                                          |
| Goodness-of-fit on $F^2$                      | 1.059                                                                    |
| Final R indexes [ $I \geq 2\text{sigma}(I)$ ] | $R_1 = 0.0501$ , $wR_2 = 0.1184$                                         |
| Final R indexes (all data)                    | $R_1 = 0.0734$ , $wR_2 = 0.1298$                                         |
| Largest diff. peak / hole                     | $1.44 / -0.59 \text{ e \AA}^{-3}$                                        |

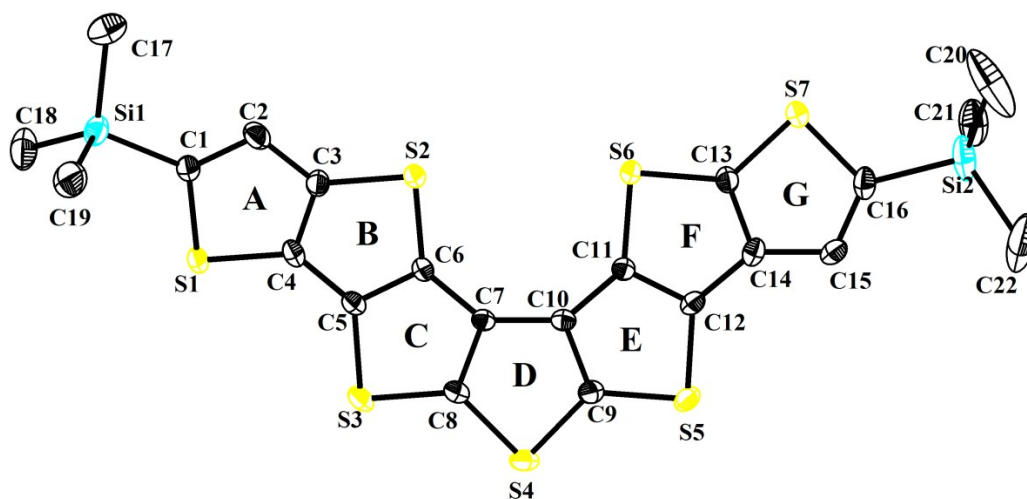

Figure S35. The crystal structures for compound **1**. Carbon, selenium, sulfur, and silicon atoms are depicted with thermal ellipsoids set at 50% probability level, and all hydrogen atoms are omitted for clarity.

Completed crystal data for **2**

Table S6. Crystal data and structure refinement for **2**

|                     |          |
|---------------------|----------|
| Identification code | <b>2</b> |
|                     | S25      |

|                                   |                                                                |                |
|-----------------------------------|----------------------------------------------------------------|----------------|
| Empirical formula                 | C <sub>25</sub> H <sub>28</sub> S <sub>7</sub> Si <sub>3</sub> |                |
| Formula weight                    | 637.16                                                         |                |
| Temperature                       | 150.01 K                                                       |                |
| Wavelength                        | 0.71073 Å                                                      |                |
| Crystal system                    | Monoclinic                                                     |                |
| Space group                       | P2 <sub>1</sub> /c                                             |                |
| Unit cell dimensions              | a = 19.581(3) Å                                                | α = 90°        |
|                                   | b = 11.5417(15) Å                                              | β = 93.100(5)° |
|                                   | c = 13.894(2) Å                                                | γ = 90°        |
| Volume                            | 3135.6(7) Å <sup>3</sup>                                       |                |
| Z                                 | 4                                                              |                |
| Density (calculated)              | 1.350 mg/m <sup>3</sup>                                        |                |
| Absorption coefficient            | 0.633 mm <sup>-1</sup>                                         |                |
| F(000)                            | 1328                                                           |                |
| Crystal size                      | 0.21 x 0.14 x 0.07 mm <sup>3</sup>                             |                |
| θ range for data collection       | 2.295 to 26.000°                                               |                |
| Index ranges                      | -24 ≤ h ≤ 24, -12 ≤ k ≤ 14, -17 ≤ l ≤ 13                       |                |
| Reflections collected             | 23591                                                          |                |
| Independent reflections           | 6145 [R <sub>(int)</sub> = 0.0697]                             |                |
| Completeness to theta = 25.242°   | 99.9 %                                                         |                |
| Absorption correction             | Semi-empirical from equivalents                                |                |
| Max. and min. transmission        | 0.7457 and 0.5563                                              |                |
| Refinement method                 | Full-matrix least-squares on F <sup>2</sup>                    |                |
| Data / restraints / parameters    | 6145 / 24 / 356                                                |                |
| Goodness-of-fit on F <sup>2</sup> | 1.039                                                          |                |
| Final R indices [I > 2sigma(I)]   | R <sub>1</sub> = 0.0618, wR <sub>2</sub> = 0.1378              |                |
| R indices (all data)              | R <sub>1</sub> = 0.1062, wR <sub>2</sub> = 0.1626              |                |
| Extinction coefficient            | n / a                                                          |                |
| Largest diff. peak and hole       | 0.794 and -0.441 e Å <sup>-3</sup>                             |                |

---

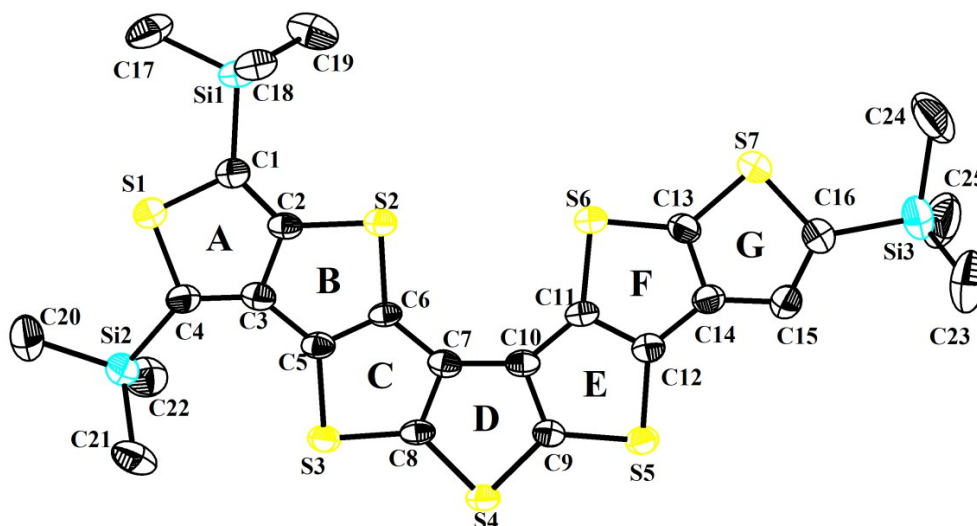

Figure S36. The crystal structures for compound **2**. Carbon, selenium, sulfur, and silicon atoms are depicted with thermal ellipsoids set at 50% probability level, and all hydrogen atoms are omitted for clarity.

### Completed crystal data for **3**

Table S7. Crystal data and structure refinement for **3**

|                                         |                                                            |                            |
|-----------------------------------------|------------------------------------------------------------|----------------------------|
| Identification code                     | <b>3</b>                                                   |                            |
| Empirical formula                       | $C_{25}H_{28}S_7Si_3$                                      |                            |
| Formula weight                          | 637.16                                                     |                            |
| Temperature                             | 298.0 K                                                    |                            |
| Wavelength                              | 0.71073 Å                                                  |                            |
| Crystal system                          | Triclinic                                                  |                            |
| Space group                             | $P_{-1}$                                                   |                            |
| Unit cell dimensions                    | $a = 6.3763(10)$ Å                                         | $\alpha = 82.974(4)^\circ$ |
|                                         | $b = 13.611(2)$ Å                                          | $\beta = 87.780(4)^\circ$  |
|                                         | $c = 18.956(3)$ Å                                          | $\gamma = 78.881(5)^\circ$ |
| Volume                                  | $1598.2(5)$ Å <sup>3</sup>                                 |                            |
| Z                                       | 2                                                          |                            |
| Density (calculated)                    | 1.324 mg / m <sup>3</sup>                                  |                            |
| Absorption coefficient                  | 0.621 mm <sup>-1</sup>                                     |                            |
| F(000)                                  | 664                                                        |                            |
| Crystal size                            | 0.21 x 0.11 x 0.06 mm <sup>3</sup>                         |                            |
| $\theta$ range for data collection      | 2.520 to 25.499°                                           |                            |
| Index ranges                            | $-7 \leq h \leq 6, -16 \leq k \leq 16, -22 \leq l \leq 22$ |                            |
| Reflections collected                   | 25184                                                      |                            |
| Independent reflections                 | 5944 [R(int) = 0.0986]                                     |                            |
| Completeness to $\theta = 25.242^\circ$ | 99.8%                                                      |                            |
| Absorption correction                   | Semi-empirical from equivalents                            |                            |

|                                   |                                                   |
|-----------------------------------|---------------------------------------------------|
| Max. and min. transmission        | 0.7457 and 0.7009                                 |
| Refinement method                 | Full-matrix least-squares on F <sup>2</sup>       |
| Data / restraints / parameters    | 5944 / 30 / 356                                   |
| Goodness-of-fit on F <sup>2</sup> | 1.027                                             |
| Final R indices [I > 2sigma(I)]   | R <sub>1</sub> = 0.0594, wR <sub>2</sub> = 0.1226 |
| R indices (all data)              | R <sub>1</sub> = 0.1307, wR <sub>2</sub> = 0.1604 |
| Extinction coefficient            | n / a                                             |
| Largest diff. peak and hole       | 0.435 and -0.276 e Å <sup>-3</sup>                |

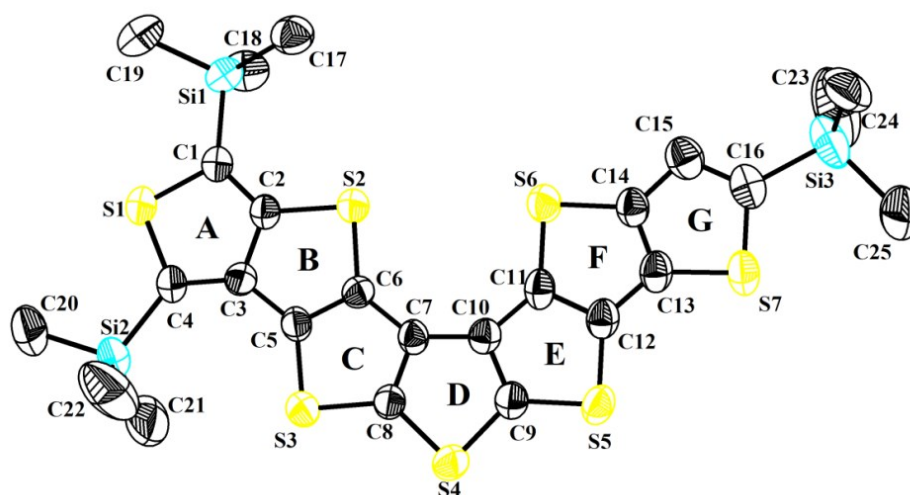

Figure S37. The crystal structures for compound **3**. Carbon, selenium, sulfur, and silicon atoms are depicted with thermal ellipsoids set at 50% probability level, and all hydrogen atoms are omitted for clarity.

#### Completed crystal data for **4**

Table S8. Crystal data and structure refinement for **4**

|                        |                                                                |                 |
|------------------------|----------------------------------------------------------------|-----------------|
| Identification code    | <b>4</b>                                                       |                 |
| Empirical formula      | C <sub>22</sub> H <sub>20</sub> S <sub>7</sub> Si <sub>2</sub> |                 |
| Formula weight         | 564.98                                                         |                 |
| Temperature            | 230.39 K                                                       |                 |
| Wavelength             | 0.71073 Å                                                      |                 |
| Crystal system         | Monoclinic                                                     |                 |
| Space group            | C2/c                                                           |                 |
| Unit cell dimensions   | a = 9.767(2) Å                                                 | α = 90°.        |
|                        | b = 8.0917(19) Å                                               | β = 92.755(5)°. |
|                        | c = 31.991(8) Å                                                | γ = 90°.        |
| Volume                 | 2525.5(10) Å <sup>3</sup>                                      |                 |
| Z                      | 4                                                              |                 |
| Density (calculated)   | 1.486 mg/m <sup>3</sup>                                        |                 |
| Absorption coefficient | 0.730 mm <sup>-1</sup>                                         |                 |

|                                         |                                                                       |
|-----------------------------------------|-----------------------------------------------------------------------|
| F(000)                                  | 1168                                                                  |
| Crystal size                            | 0.22 x 0.18 x 0.13 mm <sup>3</sup>                                    |
| $\theta$ range for data collection      | 2.550 to 28.454°                                                      |
| Index ranges                            | -11 $\leq$ h $\leq$ 12, -10 $\leq$ k $\leq$ 9, -42 $\leq$ l $\leq$ 42 |
| Reflections collected                   | 9273                                                                  |
| Independent reflections                 | 3140 [ $R_{\text{(int)}} = 0.0536$ ]                                  |
| Completeness to $\theta = 25.242^\circ$ | 98.5 %                                                                |
| Absorption correction                   | Semi-empirical from equivalents                                       |
| Max. and min. transmission              | 0.7457 and 0.4202                                                     |
| Refinement method                       | Full-matrix least-squares on $F^2$                                    |
| Data / restraints / parameters          | 3140 / 0 / 144                                                        |
| Goodness-of-fit on $F^2$                | 1.084                                                                 |
| Final R indices [ $I > 2\sigma(I)$ ]    | $R_1 = 0.0453$ , $wR_2 = 0.1173$                                      |
| R indices (all data)                    | $R_1 = 0.0474$ , $wR_2 = 0.1188$                                      |
| Extinction coefficient                  | n / a                                                                 |
| Largest diff. peak and hole             | 0.501 and -0.533 e $\text{\AA}^{-3}$                                  |

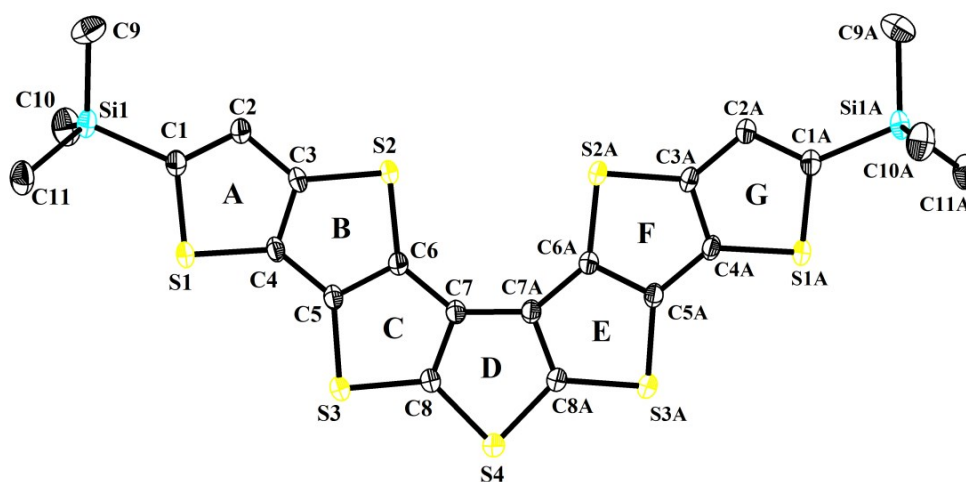

Figure S38. The crystal structures for compound 4. Carbon, selenium, sulfur, and silicon atoms are depicted with thermal ellipsoids set at 50% probability level, and all hydrogen atoms are omitted for clarity.
